# Supplementary material
Source: PubMed Central journal article supplement (PMC9989898)
Supplement: jamainternmed-e226529-s002.pdf [file jamainternmed-e226529-s002.pdf]

1 **Routine antibiotic prescription and resistance**  
2 **feedback in primary care: A nationwide pragmatic**  
3 **randomized controlled trial**  
4 **Clinical Study Protocol**

Study Type: Pragmatic randomized controlled trial  
Study Categorisation: Category A pragmatic trial  
Study Registration: Planned: clinicaltrials.gov and kofam.ch  
Study Identifier: CEB-NFP72  
Sponsor-Investigator: Prof. Heiner C. Bucher, MD MPH  
Basel Institute for Clinical Epidemiology and Biostatistics (ceb)  
University Hospital Basel, Spitalstrasse 12  
CH-4031 Basel, Switzerland  
Phone +41 61 556 5100; Fax +41 61 265 3109  
Email: heiner.bucher@usb.ch

Investigators: PD Dr. Andreas Kronenberg, MD  
Institute for Infectious Diseases  
University of Bern, Bern, Switzerland  
Dr. Julia Bielicki, MD MPH  
Infectious Diseases and Paediatric Pharmacology University  
Children's Hospital Basel, Basel, Switzerland and St. George's  
University London, London, UK  
Prof. Andreas Zeller, MD MSc  
Centre for Primary Health Care, University of Basel, Basel,  
Switzerland  
Prof. Andreas Widmer, MD. MS  
Division of Infectious Diseases and Hospital Hygiene, University  
Hospital Basel, Basel, Switzerland

Investigational Product: Not applicable / Pragmatic trial in usual care

Protocol Version and Date: Version 1.1, July 12<sup>th</sup> 2017

5 **CONFIDENTIAL**

6 The information contained in this document is explicitly not confidential.

7 **Signature Pages**

8

Study number CEB-NFP72

Study Title Routine antibiotic prescription and resistance  
feedback in primary care: A nationwide pragmatic  
randomized controlled trial

9

10 The Sponsor-Investigator and trial statistician have approved the protocol version [1  
11 (dated 18.05.2017)], and confirm hereby to conduct the study according to the  
12 protocol, current version of the World Medical Association Declaration of Helsinki,  
13 ICH-GCP guidelines or ISO 14155 norm if applicable and the local legally applicable  
14 requirements.

15

16 **Sponsor-Investigator:**

17 Prof. Heiner C. Bucher, MD MPH

18

19

20

Basel, 12.07.2017

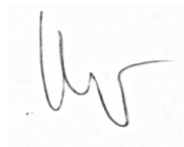

---

21

22

23 **Principal Investigators:**

24 I have read and understood this trial protocol and agree to conduct the trial as set out  
25 in this study protocol, the current version of the World Medical Association  
26 Declaration of Helsinki, ICH-GCP guidelines or ISO 14155 norm and the local legally  
27 applicable requirements.

28

Principal  
investigators

PD Dr. Andreas Kronenberg, MD, Institute for  
Infectious Diseases, University of Bern, Bern,  
Switzerland

Dr. Julia Bielicki, MD MPH, Infectious Diseases and  
Paediatric Pharmacology University Children's  
Hospital Basel, Basel, Switzerland and St. George's  
University London, London, UK

Prof. Andreas Zeller, MD MSc, Centre for Primary  
Health Care, University of Basel, Basel, Switzerland

Prof. Andreas Widmer, MD, Division of Infectious  
Diseases and Hospital Hygiene, University Hospital  
Basel, Basel, Switzerland

29 PD Andreas Kronenberg

30

Bern, 12.07.2017



31

32 Dr. Julia Bielicki

33



London, 12.07.2017

34

35 Prof. Andreas Zeller

36

Basel, 12.07.2017



37

38 Prof. Andreas Widmer

39



Basel, 12.07.2017

40

|    |                                                                                  |           |
|----|----------------------------------------------------------------------------------|-----------|
| 41 | <b>Table of Contents</b>                                                         |           |
| 42 | <b>STUDY SYNOPSIS</b> .....                                                      | <b>7</b>  |
| 43 | <b>STUDY SUMMARY IN LOCAL AND PLAIN LANGUAGE</b> .....                           | <b>11</b> |
| 44 | <b>ABBREVIATIONS</b> .....                                                       | <b>12</b> |
| 45 | <b>STUDY SCHEDULE</b> .....                                                      | <b>13</b> |
| 46 | <b>1. STUDY ADMINISTRATIVE STRUCTURE</b> .....                                   | <b>14</b> |
| 47 | 1.1 Sponsor, Sponsor-Investigator .....                                          | 14        |
| 48 | 1.2 Principal Investigator(s) .....                                              | 14        |
| 49 | 1.3 Statistician ("Biostatistician").....                                        | 14        |
| 50 | 1.4 Clinical Epidemiologist.....                                                 | 14        |
| 51 | 1.5 Laboratory .....                                                             | 14        |
| 52 | 1.6 Monitoring institution .....                                                 | 14        |
| 53 | 1.7 Data Safety Monitoring Committee.....                                        | 14        |
| 54 | 1.8 Any other relevant Committee, Person, Organization, Institution.....         | 15        |
| 55 | <b>2. ETHICAL AND REGULATORY ASPECTS</b> .....                                   | <b>15</b> |
| 56 | 2.1 Study registration .....                                                     | 15        |
| 57 | 2.2 Categorization of study .....                                                | 15        |
| 58 | 2.3 Competent Ethics Committee (CEC).....                                        | 16        |
| 59 | 2.4 Competent Authorities (CA).....                                              | 16        |
| 60 | 2.5 Ethical Conduct of the Study.....                                            | 16        |
| 61 | 2.6 Declaration of interest .....                                                | 16        |
| 62 | 2.7 Patient Information and Informed Consent.....                                | 16        |
| 63 | 2.8 Participant privacy and confidentiality.....                                 | 17        |
| 64 | 2.9 Early termination of the study .....                                         | 17        |
| 65 | 2.10 Protocol amendments .....                                                   | 17        |
| 66 | <b>3. BACKGROUND AND RATIONALE</b> .....                                         | <b>18</b> |
| 67 | 3.1 Background and Rationale.....                                                | 18        |
| 68 | 3.2 Investigational Product (treatment, device) and Indication.....              | 18        |
| 69 | 3.3 Preclinical Evidence.....                                                    | 18        |
| 70 | 3.4 Clinical Evidence to Date .....                                              | 18        |
| 71 | 3.5 Dose Rationale / Medical Device: Rationale for the intended purpose in study |           |
| 72 | (pre-market MD) .....                                                            | 19        |
| 73 | 3.6 Explanation for choice of comparator (or placebo).....                       | 19        |
| 74 | 3.7 Risks / Benefits .....                                                       | 19        |
| 75 | 3.8 Justification of choice of study population .....                            | 20        |
| 76 | <b>4. STUDY OBJECTIVES</b> .....                                                 | <b>21</b> |
| 77 | 4.1 Overall Objective.....                                                       | 21        |
| 78 | 4.2 Primary Objective.....                                                       | 21        |
| 79 | 4.3 Secondary Objectives .....                                                   | 21        |
| 80 | 4.4 Safety Objectives .....                                                      | 21        |

|     |                                                                             |           |
|-----|-----------------------------------------------------------------------------|-----------|
| 81  | <b>5. STUDY OUTCOMES.....</b>                                               | <b>22</b> |
| 82  | 5.1 Primary Outcome .....                                                   | 22        |
| 83  | 5.2 Secondary Outcomes .....                                                | 22        |
| 84  | 5.3 Other Outcomes of Interest.....                                         | 22        |
| 85  | 5.4 Safety Outcomes.....                                                    | 22        |
| 86  | <b>6. STUDY DESIGN.....</b>                                                 | <b>23</b> |
| 87  | 6.1 General study design and justification of design .....                  | 23        |
| 88  | 6.2 Methods of minimizing bias.....                                         | 23        |
| 89  | 6.2.1 Randomization .....                                                   | 23        |
| 90  | 6.2.2 Blinding procedures .....                                             | 23        |
| 91  | 6.2.3 Other methods of minimizing bias.....                                 | 23        |
| 92  | 6.3 Unblinding Procedures (Code break) .....                                | 23        |
| 93  | <b>7. STUDY POPULATION.....</b>                                             | <b>24</b> |
| 94  | 7.1 Eligibility criteria .....                                              | 24        |
| 95  | 7.2 Recruitment and screening .....                                         | 24        |
| 96  | 7.3 Assignment to study groups.....                                         | 24        |
| 97  | 7.4 Criteria for withdrawal / discontinuation of participants .....         | 24        |
| 98  | <b>8. STUDY INTERVENTION .....</b>                                          | <b>25</b> |
| 99  | 8.1 Identity of Investigational Products (treatment / medical device) ..... | 25        |
| 100 | 8.1.1 Experimental Intervention (treatment / medical device) .....          | 25        |
| 101 | 8.1.2 Control Intervention (standard/routine/comparator treatment / medical |           |
| 102 | device) .....                                                               | 26        |
| 103 | 8.1.3 Packaging, Labelling and Supply (re-supply) .....                     | 26        |
| 104 | 8.1.4 Storage Conditions.....                                               | 26        |
| 105 | 8.2 Administration of experimental and control interventions .....          | 26        |
| 106 | 8.2.1 Experimental Intervention .....                                       | 26        |
| 107 | 8.2.2 Control Intervention.....                                             | 26        |
| 108 | 8.3 Dose / Device modifications.....                                        | 26        |
| 109 | 8.4 Compliance with study intervention .....                                | 26        |
| 110 | 8.5 Data Collection and Follow-up for withdrawn participants.....           | 26        |
| 111 | 8.6 Trial specific preventive measures .....                                | 27        |
| 112 | 8.7 Concomitant Interventions (treatments).....                             | 27        |
| 113 | 8.8 Study Drug / Medical Device Accountability .....                        | 27        |
| 114 | 8.9 Return or Destruction of Study Drug / Medical Device .....              | 27        |
| 115 | <b>9. STUDY ASSESSMENTS.....</b>                                            | <b>28</b> |
| 116 | 9.1 Study flow chart(s) / table of study procedures and assessments .....   | 28        |
| 117 | 9.2 Assessments of outcomes .....                                           | 30        |
| 118 | 9.2.1 Assessment of primary outcome.....                                    | 30        |
| 119 | 9.2.2 Assessment of secondary outcomes .....                                | 30        |
| 120 | 9.2.3 Assessment of other outcomes of interest.....                         | 30        |

|     |                                                                        |           |
|-----|------------------------------------------------------------------------|-----------|
| 121 | 9.2.4 Assessment of safety outcomes .....                              | 30        |
| 122 | 9.2.5 Assessments in participants who prematurely stop the study ..... | 30        |
| 123 | 9.3 Procedures at each visit.....                                      | 30        |
| 124 | <b>10. SAFETY.....</b>                                                 | <b>31</b> |
| 125 | <b>11. STATISTICAL METHODS.....</b>                                    | <b>31</b> |
| 126 | 11.1 Hypothesis .....                                                  | 31        |
| 127 | 11.2 Determination of Sample Size .....                                | 31        |
| 128 | 11.3 Statistical criteria of termination of trial .....                | 31        |
| 129 | 11.4 Planned Analyses .....                                            | 32        |
| 130 | 11.4.1 Datasets to be analysed, analysis populations .....             | 32        |
| 131 | 11.4.2 Primary Analysis.....                                           | 32        |
| 132 | 11.4.3 Secondary Analyses.....                                         | 32        |
| 133 | 11.4.4 Interim analyses .....                                          | 33        |
| 134 | 11.4.5 Safety analysis .....                                           | 33        |
| 135 | 11.4.6 Deviation(s) from the original statistical plan .....           | 33        |
| 136 | 11.5 Handling of missing data and drop-outs .....                      | 33        |
| 137 | <b>12. QUALITY ASSURANCE AND CONTROL.....</b>                          | <b>34</b> |
| 138 | 12.1 Data handling and record keeping / archiving .....                | 34        |
| 139 | 12.1.1 Case Report Forms .....                                         | 35        |
| 140 | 12.1.2 Specification of source documents .....                         | 35        |
| 141 | 12.1.3 Record keeping / archiving.....                                 | 35        |
| 142 | 12.2 Data management.....                                              | 35        |
| 143 | 12.2.3 Analysis and archiving.....                                     | 35        |
| 144 | 12.2.4 Electronic and central data validation .....                    | 35        |
| 145 | 12.3 Monitoring .....                                                  | 35        |
| 146 | 12.4 Audits and Inspections.....                                       | 35        |
| 147 | 12.5 Confidentiality, Data Protection .....                            | 35        |
| 148 | 12.6 Storage of biological material and related health data .....      | 36        |
| 149 | <b>13. PUBLICATION AND DISSEMINATION POLICY.....</b>                   | <b>37</b> |
| 150 | <b>14. FUNDING AND SUPPORT .....</b>                                   | <b>37</b> |
| 151 | 14.1 Funding .....                                                     | 37        |
| 152 | 14.2 Other Support.....                                                | 37        |
| 153 | <b>15. INSURANCE .....</b>                                             | <b>37</b> |
| 154 | <b>16. REFERENCES .....</b>                                            | <b>38</b> |
| 155 | <b>17. APPENDIX .....</b>                                              | <b>40</b> |
| 156 |                                                                        |           |
| 157 |                                                                        |           |

|                                       |                                                                                                                                                                                                                                                                                                                                                                                                                                                                                                                                                                                                                                                                                                                                                                                                                                                                                                                                                                                                                                                                                                                                                                                                                                                                                                                                                                                                                                                                         |
|---------------------------------------|-------------------------------------------------------------------------------------------------------------------------------------------------------------------------------------------------------------------------------------------------------------------------------------------------------------------------------------------------------------------------------------------------------------------------------------------------------------------------------------------------------------------------------------------------------------------------------------------------------------------------------------------------------------------------------------------------------------------------------------------------------------------------------------------------------------------------------------------------------------------------------------------------------------------------------------------------------------------------------------------------------------------------------------------------------------------------------------------------------------------------------------------------------------------------------------------------------------------------------------------------------------------------------------------------------------------------------------------------------------------------------------------------------------------------------------------------------------------------|
| <b>Sponsor / Sponsor-Investigator</b> | Prof. Heiner C. Bucher, MD MPH<br>Basel Institute for Clinical Epidemiology and Biostatistics<br>University Hospital Basel<br>Spitalstrasse 12<br>CH-4031 Basel, Switzerland<br>Phone +41 61 556 5100; Fax +41 61 265 3109<br>Email: heiner.bucher@usb.ch                                                                                                                                                                                                                                                                                                                                                                                                                                                                                                                                                                                                                                                                                                                                                                                                                                                                                                                                                                                                                                                                                                                                                                                                               |
| <b>Study Title:</b>                   | Routine antibiotic prescription and resistance monitoring in primary care physicians: A nationwide pragmatic randomized controlled trial                                                                                                                                                                                                                                                                                                                                                                                                                                                                                                                                                                                                                                                                                                                                                                                                                                                                                                                                                                                                                                                                                                                                                                                                                                                                                                                                |
| <b>Short Title / Study ID:</b>        | CEB-NFP72                                                                                                                                                                                                                                                                                                                                                                                                                                                                                                                                                                                                                                                                                                                                                                                                                                                                                                                                                                                                                                                                                                                                                                                                                                                                                                                                                                                                                                                               |
| <b>Protocol Version and Date:</b>     | Version 1.1<br>July 11 <sup>th</sup> 2017                                                                                                                                                                                                                                                                                                                                                                                                                                                                                                                                                                                                                                                                                                                                                                                                                                                                                                                                                                                                                                                                                                                                                                                                                                                                                                                                                                                                                               |
| <b>Trial registration:</b>            | Planned: clinicaltrials.gov and kofam.ch                                                                                                                                                                                                                                                                                                                                                                                                                                                                                                                                                                                                                                                                                                                                                                                                                                                                                                                                                                                                                                                                                                                                                                                                                                                                                                                                                                                                                                |
| <b>Study category and Rationale</b>   | Category A (no pharmaceutical product, medical device or transplant are involved in this trial)                                                                                                                                                                                                                                                                                                                                                                                                                                                                                                                                                                                                                                                                                                                                                                                                                                                                                                                                                                                                                                                                                                                                                                                                                                                                                                                                                                         |
| <b>Clinical Phase:</b>                | Phase 4                                                                                                                                                                                                                                                                                                                                                                                                                                                                                                                                                                                                                                                                                                                                                                                                                                                                                                                                                                                                                                                                                                                                                                                                                                                                                                                                                                                                                                                                 |
| <b>Background and Rationale:</b>      | <p>Antibiotic resistance is an increasingly serious problem in Switzerland which is associated with the exposure and overall uptake of antibiotics in a population. Reduced antibiotic prescribing for outpatients is paralleled by a decrease in antibiotic resistance rates.</p> <p>In a recent pragmatic trial we found only promising yet not very conclusive results as those were present only in some groups. This nationwide antibiotic stewardship program with routine feedback on antibiotic prescribing was not associated with an overall change of antibiotic use. In older children, adolescents, and younger adults less antibiotics were prescribed, but not consistently over the entire intervention period.</p> <p>Hence, we now we aim to evaluate a better tailored program to obtain a better understanding of the effects on patient-relevant outcomes, on antibiotic resistance, and of the underlying mechanisms leading to different effects in certain subgroups of patients.</p> <p>We plan to evaluate a nationwide antibiotic stewardship program combining routine prescription and resistance feedback with the provision of physician and patient education material within a large-scale pragmatic randomized controlled trial in primary care physician in Switzerland. The project would be conducted within the framework of the National Program NFP 72 on antimicrobial resistance by the Swiss National Science foundation</p> |

|                                        |                                                                                                                                                                                                                                                                                                                                                                                                                                                                                                                                                                                                                                                                                                                                                                                                                                                                                                                                                                                                                                                                                                                                                                                                                                                                                                                                                                                                                                                                                                                                                                                                                                               |
|----------------------------------------|-----------------------------------------------------------------------------------------------------------------------------------------------------------------------------------------------------------------------------------------------------------------------------------------------------------------------------------------------------------------------------------------------------------------------------------------------------------------------------------------------------------------------------------------------------------------------------------------------------------------------------------------------------------------------------------------------------------------------------------------------------------------------------------------------------------------------------------------------------------------------------------------------------------------------------------------------------------------------------------------------------------------------------------------------------------------------------------------------------------------------------------------------------------------------------------------------------------------------------------------------------------------------------------------------------------------------------------------------------------------------------------------------------------------------------------------------------------------------------------------------------------------------------------------------------------------------------------------------------------------------------------------------|
| <b>Objective(s):</b>                   | To evaluate whether this nationwide antibiotic stewardship program reduces the total amount of antibiotics used in primary care.                                                                                                                                                                                                                                                                                                                                                                                                                                                                                                                                                                                                                                                                                                                                                                                                                                                                                                                                                                                                                                                                                                                                                                                                                                                                                                                                                                                                                                                                                                              |
| <b>Outcome(s):</b>                     | <p>Primary outcome: overall antibiotic use, defined as prescribed defined daily doses (DDD) of antibiotics per 100 patient consultations (total patient population) evaluated over a period of 12 months, from month 13 to month 24 post randomization (longer term intervention effect).</p> <p>Secondary outcomes:</p> <p>(1) Overall antibiotic use defined as prescribed DDD of antibiotics per 100 patient consultations evaluated over a period of 12 months, from month 1 to 12 post randomization (short-term intervention effect);</p> <p>(2) Overall antibiotic use defined as prescribed DDD of antibiotics per 100 patient consultations evaluated over a period of 24 months, from month 1 to month 24 post randomization, with two repeated measurements, over the first and the second 12 month period post randomization;</p> <p>(3) Use of broad spectrum antibiotics in the total patient population (DDD of this specific type per 100 consultations)</p> <ol style="list-style-type: none"> <li>a. quinolones</li> <li>b. oral cephalosporines ;</li> </ol> <p>(4) Hospitalizations rates</p> <ol style="list-style-type: none"> <li>a. all-cause</li> <li>b. related to infections (DRG-based definition)</li> </ol> <p>(5) Antibiotic use (DDD per 100 consultations) in four specific age groups, in patients</p> <ol style="list-style-type: none"> <li>a. &lt;6 years</li> <li>b. 6 to &lt;18 years</li> <li>c. 18 to &lt;65 years</li> <li>d. ≥ 65 years</li> </ol> <p>(6) Secondary outcomes (3) to (5) will be evaluated over two 12 month periods (from month 1 to month 12, and from month 13 to month 24).</p> |
| <b>Study design:</b>                   | Pragmatic, randomized controlled trial entirely based on routinely collected data                                                                                                                                                                                                                                                                                                                                                                                                                                                                                                                                                                                                                                                                                                                                                                                                                                                                                                                                                                                                                                                                                                                                                                                                                                                                                                                                                                                                                                                                                                                                                             |
| <b>Inclusion / Exclusion criteria:</b> | <p><u>Inclusion Criteria:</u></p> <ul style="list-style-type: none"> <li>▪ Primary care physicians in Switzerland board certified with FMH title in general internal medicine or paediatrics &amp; adolescent medicine</li> <li>▪ Above the 25<sup>th</sup> percentile of antibiotic prescribing</li> <li>▪ consulting with at least 100 patients per year</li> <li>▪ with individual Zahlstellenregister number.</li> </ul> <p>There are no exclusion criteria.</p>                                                                                                                                                                                                                                                                                                                                                                                                                                                                                                                                                                                                                                                                                                                                                                                                                                                                                                                                                                                                                                                                                                                                                                          |



|                                               |                                                                                                                                                                                                                                                                                                                                                                                                                                                                                                                                                                                                                                                                                                                                                                                                                                                                                                                       |
|-----------------------------------------------|-----------------------------------------------------------------------------------------------------------------------------------------------------------------------------------------------------------------------------------------------------------------------------------------------------------------------------------------------------------------------------------------------------------------------------------------------------------------------------------------------------------------------------------------------------------------------------------------------------------------------------------------------------------------------------------------------------------------------------------------------------------------------------------------------------------------------------------------------------------------------------------------------------------------------|
| <b>Measurements and procedures:</b>           | All measurements are based on anonymized routinely collected insurance data provided quarterly by health insurers. No data are collected for the purpose of this study or by any direct patient contact or interaction with physicians.                                                                                                                                                                                                                                                                                                                                                                                                                                                                                                                                                                                                                                                                               |
| <b>Intervention:</b>                          | The intervention is a combined antibiotic stewardship program. Physicians receive eight times (quarterly over 24 months, first in October 2017) by postal mail a feedback on their antibiotic prescriptions and updated antibiotic resistance information from the community and served patient population. The feedback is based on anonymized insurance data and includes only aggregated patient-related information (for example prescription rates in age-groups). With the first letter, educational material targeting physicians (evidence-based guidelines for conditions leading to most outpatient prescriptions in primary care) and patients (validated information material on using antibiotics wisely) are provided. Individual antibiotic prescription data will also be made available on a study website that can be accessed by each physician in the intervention group by a unique access code. |
| <b>Control:</b>                               | Usual care without any material or feedback.                                                                                                                                                                                                                                                                                                                                                                                                                                                                                                                                                                                                                                                                                                                                                                                                                                                                          |
| <b>Number of Participants with Rationale:</b> | We aim to detect a minimum reduction of total antibiotic prescriptions by 5% in the intention to treat population with a statistical power of 90%. This corresponds 2590 physicians randomized (we will randomize 2590 physicians in a 2:1 ratio to the intervention (n=1725) and control group (n=865)). We deem this 5% reduction of antibiotic prescriptions a minimally public health relevant effect on a nationwide level in Switzerland.                                                                                                                                                                                                                                                                                                                                                                                                                                                                       |
| <b>Study Duration:</b>                        | 24 months                                                                                                                                                                                                                                                                                                                                                                                                                                                                                                                                                                                                                                                                                                                                                                                                                                                                                                             |
| <b>Study Schedule:</b>                        | October 2017 to September 2019                                                                                                                                                                                                                                                                                                                                                                                                                                                                                                                                                                                                                                                                                                                                                                                                                                                                                        |
| <b>Investigator(s):</b>                       | <p>Prof. Heiner C. Bucher, MD MPH, Basel Institute for Clinical Epidemiology and Biostatistics University Hospital Basel</p> <p>PD Dr. Andreas Kronenberg, MD, Institute for Infectious Diseases, University of Bern, Bern, Switzerland</p> <p>Julia Bielicki, MD, MPH, Infectious Diseases and Paediatric Pharmacology University Children's Hospital Basel, Basel, Switzerland and St. George's University London, London, UK</p> <p>Prof. Andreas Zeller, MD, MSc, Centre for Primary Health Care, University of Basel, Basel, Switzerland</p> <p>Prof. Andreas Widmer, MD,MS Division of Infectious Diseases and Hospital Hygiene, University Hospital Basel, Basel, Switzerland</p> <p>PD Matthias Schwenkglenks, PhD, Institute of Pharmaceutical Medicine, University of Basel, Basel, Switzerland</p>                                                                                                         |

|                                    |                                                                                                                                                                                                                                                                                                                                                                                                                                                                                                                                                                                                                                                                                                                                                                                               |
|------------------------------------|-----------------------------------------------------------------------------------------------------------------------------------------------------------------------------------------------------------------------------------------------------------------------------------------------------------------------------------------------------------------------------------------------------------------------------------------------------------------------------------------------------------------------------------------------------------------------------------------------------------------------------------------------------------------------------------------------------------------------------------------------------------------------------------------------|
| <b>Study Centre(s):</b>            | Single-center: Basel Institute for Epidemiology and Biostatistics (CEB), University Hospital Basel, Department of Clinical Research                                                                                                                                                                                                                                                                                                                                                                                                                                                                                                                                                                                                                                                           |
| <b>Statistical Considerations:</b> | <p>The intervention effect on the primary endpoint will be evaluated by comparing the intervention and the control group by means of ANCOVA modelling including baseline as a covariate.</p> <p>The sample size was derived to ensure a statistical power of 90% to compare the intervention group to control at 0.05 significance level, and assuming a minimum meaningful reduction in total antibiotics prescription by 5%.</p> <p>Secondary outcomes, including the response over the first year post-randomization, endpoints specific to broad spectrum antibiotics and response stratified by age groups, will be also explored by means of ANCOVA modelling.</p> <p>Hospitalization rates in the intervention and control group will be modelled by means of logistic regression.</p> |
| <b>GCP Statement:</b>              | This study will be conducted in compliance with the protocol, the current version of the Declaration of Helsinki, the ICH-GCP or ISO EN 14155 (as far as applicable) as well as all national legal and regulatory requirements.                                                                                                                                                                                                                                                                                                                                                                                                                                                                                                                                                               |

159  
160

161 **STUDY SUMMARY IN LOCAL AND PLAIN LANGUAGE**

162 **Routine Feedback zu Antibiotikaverordnungen und Resistenzentwicklung in**  
163 **der Grundversorgung**

164 **Hintergrund:** Antibiotikaresistenzen stehen in direktem Zusammenhang mit der  
165 Verschreibungshäufigkeit. In den letzten fünf Jahren hat sich die Anzahl resistenter  
166 Keime mehr als verdoppelt. Erfahrungswerte zeigen, dass eine zurückhaltende  
167 Verschreibungspraxis von Antibiotika zu einer Verminderung von Resistenzen führt.  
168 Am meisten Antibiotika werden in der Grundversorgung verschrieben.

169 **Ziele:** In einer nationalen Interventionsstudie soll untersucht werden, ob  
170 Antibiotikaverschreibungen reduziert werden können, wenn Ärzte evidenzbasiertes  
171 Informationsmaterial und Rückmeldungen zu ihren verordneten Antibiotika und der  
172 Resistenzlage erhalten.

173 **Methoden:** Mit Abrechnungsdaten der drei grössten Krankenversicherer CSS,  
174 Helsana und Sanitas mit 3.8 Mio Versicherten (40% der Schweizer Bevölkerung)  
175 sollen die Antibiotikaverschreibung von Hausärzten ausgewertet werden. 2590 Ärzte  
176 erhalten entweder Behandlungsleitlinien zu Atemwegs- und Harnwegsinfekten und  
177 Patienteninformationsmaterial sowie über 2 Jahre regelmässig Rückmeldung zu  
178 ihren Antibiotikaverschreibungen und zur Resistenzentwicklung in ihrem  
179 Versorgungsgebiet, oder sie erhalten keine Informationen. Für diese Studie erhalten  
180 die Studienleiter ausschliesslich anonymisierte Daten und können Ärzte und  
181 Patienten nicht identifizieren.

182 Wir streben eine 5% Reduktion der Antibiotikaverschreibung durch an der Studie  
183 teilnehmende Ärzte an. Wir untersuchen die Verschreibung von Antibiotika nach  
184 Altersgruppen, Gebrauch von Breitspektrumantibiotika, sowie die Häufigkeit von  
185 Krankenhauseinweisungen aufgrund von Infekten.

186 **Bedeutung / möglicher Nutzen:** Die Resultate sollen Auskunft zur Wirksamkeit  
187 eines routinemässigen Feedbacks bei Antibiotikaverschreibungen geben. Die Studie  
188 wird breit unterstützt, u.a. im Rahmen des Nationalen Forschungsprogramms (NFP)  
189 72 durch den Schweizerische Nationalfonds zur Förderung der wissenschaftlichen  
190 Forschung (SNF), durch die FMH (Verbindung der Schweizer Ärztinnen und Ärzte)  
191 und von den drei grössten Krankenversicherern CSS, Helsana und Sanitas. Die  
192 epidemiologischen Ergebnisse der Studie sind von grossem Nutzen für zukünftige  
193 grundlegende Entscheidungen und Strategieentwicklungen in der schweizerischen  
194 Gesundheitspolitik.

195 **ABBREVIATIONS**

196

|       |                                                                                                                                      |
|-------|--------------------------------------------------------------------------------------------------------------------------------------|
| AE    | Adverse Event                                                                                                                        |
| CA    | Competent Authority (e.g. Swissmedic)                                                                                                |
| CEC   | Competent Ethics Committee                                                                                                           |
| CRF   | Case Report Form                                                                                                                     |
| ClinO | Ordinance on Clinical Trials in Human Research ( <i>in German: KlinV, in French: OClin</i> )                                         |
| eCRF  | Electronic Case Report Form                                                                                                          |
| GCP   | Good Clinical Practice                                                                                                               |
| IB    | Investigator's Brochure                                                                                                              |
| Ho    | Null hypothesis                                                                                                                      |
| H1    | Alternative hypothesis                                                                                                               |
| HFG   | Humanforschungsgesetz (Law on human research)                                                                                        |
| IMP   | Investigational Medicinal Product                                                                                                    |
| ISO   | International Organisation for Standardisation                                                                                       |
| ITT   | Intention to treat                                                                                                                   |
| KlinV | Verordnung über klinische Versuche in der Humanforschung ( <i>in English: ClinO, in French OClin</i> )                               |
| MD    | Medical Device                                                                                                                       |
| OClin | Ordonnance sur les essais cliniques dans le cadre de la recherche sur l'être humain ( <i>in German : KlinV, in English : ClinO</i> ) |
| PI    | Principal Investigator                                                                                                               |
| SOP   | Standard Operating Procedure                                                                                                         |
| SPC   | Summary of product characteristics                                                                                                   |

197

198

199 **STUDY SCHEDULE**

200 **Study Timetable**

| Task & Month (planned start 09/2017)                      | 1 | 2 | 5 | 8 | 11 | 14 | 17 | 20 | 23 | 29 |
|-----------------------------------------------------------|---|---|---|---|----|----|----|----|----|----|
| <b>Selection and randomization (September 2017)</b>       | x |   |   |   |    |    |    |    |    |    |
| Provision of feedback by postal mail                      |   | x | x | x | x  | x  | x  | x  | x  |    |
| Provision of online service                               |   | x | x | x | x  | x  | x  | x  | x  |    |
| Transfer and provision of routine data by health insurers | x | x | x | x | x  | x  | x  | x  | x  | x  |
| Start of main data analysis                               |   |   |   |   |    |    |    |    |    | x  |

201

202 **Timeline**

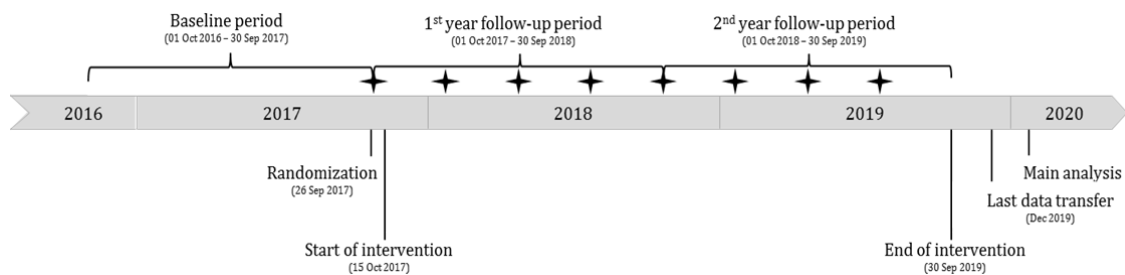

203

204

205 **1. STUDY ADMINISTRATIVE STRUCTURE**

206 **1.1 Sponsor, Sponsor-Investigator**

207 Prof. Heiner C. Bucher, MD MPH

208 Director

209 Basel Institute for Clinical Epidemiology and Biostatistics

210 University Hospital Basel

211 Spitalstrasse 12

212 CH-4031 Basel, Switzerland

213 Phone +41 61 556 5100

214 Fax +41 61 265 3109

215 Email [heiner.bucher@usb.ch](mailto:heiner.bucher@usb.ch)

216

217 **1.2 Principal Investigator(s)**

218 Prof. Heiner C. Bucher, MD MPH, Basel Institute for Clinical Epidemiology and  
219 Biostatistics, University Hospital Basel, Basel, Switzerland

220 PD Dr. Andreas Kronenberg, MD, Institute for Infectious Diseases, University of Bern,  
221 Bern, Switzerland

222 Dr. Julia Bielicki, MD MPH, Infectious Diseases and Paediatric Pharmacology  
223 University Children's Hospital Basel, Basel, Switzerland and St. George's University  
224 London, London, UK

225 Prof. Andreas Zeller, MD MSc, Centre for Primary Health Care, University of Basel,  
226 Basel, Switzerland

227 Prof. Andreas Widmer, MD, Division of Infectious Diseases and Hospital Hygiene,  
228 University Hospital Basel, Basel, Switzerland

229 **1.3 Statistician ("Biostatistician")**

230 Giusi Moffa, PhD, ([giusi.moffa@usb.ch](mailto:giusi.moffa@usb.ch), +41 61 328 51 39) Basel Institute for Clinical  
231 Epidemiology and Biostatistics, University Hospital Basel, Basel, Switzerland

232 **1.4 Clinical Epidemiologist**

233 Dr. med. Lars G. Hemkens, MPH ([lars.hemkens@usb.ch](mailto:lars.hemkens@usb.ch)) Basel Institute for Clinical  
234 Epidemiology and Biostatistics, University Hospital Basel, Basel, Switzerland

235 **1.5 Laboratory**

236 Not applicable.

237 **1.6 Monitoring institution**

238 See Section 1.7.

239 **1.7 Data Safety Monitoring Committee**

240 No data used in this study is collected for the purpose of research; therefore there is  
241 no specific data or safety monitoring committee. All data is collected for health  
242 insurers during routine care in usual practice.

243 However, we appoint an independent general practitioner who will serve as a  
244 guardian in case of patient or physician complaints or any potential concerns about

245 this study, related to perceived safety issues or otherwise, and who coordinates  
246 further action.

247 Ethics committees have guaranteed access to all original and processed data and  
248 permission to audit the project at any time (access to non-anonymized data must be  
249 authorized by the responsible data managers of the participating health insurers due  
250 to Swiss data protection legislation).

251

## 252 **1.8 Any other relevant Committee, Person, Organization, Institution**

253

| <b>Partner</b>                                                     | <b>Reference</b>                                                                                   | <b>Contribution</b>                                                                                                                          |
|--------------------------------------------------------------------|----------------------------------------------------------------------------------------------------|----------------------------------------------------------------------------------------------------------------------------------------------|
| Sanitas (Zurich)                                                   | Health insurance<br>(Cura futura group)                                                            | Provision of claims and cost data<br>Coordination of data management processes                                                               |
| CSS (Lucerne)                                                      | Health insurance<br>(Cura futura group)                                                            | Provision of claims data and contribution to<br>health economic analysis                                                                     |
| Helsana (Zurich)                                                   | Health insurance<br>(Cura futura group)                                                            | Provision of claims data                                                                                                                     |
| Cura futura<br>(Berne)                                             | Association of four main health<br>insurers                                                        | Coordination, communication, support                                                                                                         |
| Swiss Medical<br>Association<br>(FMH, Berne)                       | Official association of Swiss<br>physicians                                                        | Official supporter of the intervention program<br>to increase impact                                                                         |
| NFP 72<br>Antimicrobial<br>Resistance                              | Swiss National Science<br>Foundation                                                               | Funder and official supporter of the<br>intervention program                                                                                 |
| Institute of<br>Infectious<br>Diseases<br>(University of<br>Berne) | Swiss Centre for Antibiotic<br>Resistance                                                          | Provision of antibiotic resistance data<br>Support of the intervention<br>Expertise in antibiotic stewardship programs                       |
| Swissnoso                                                          | Developer of guidelines for<br>prevention of nosocomial<br>infections and antibiotic<br>resistance | Expertise in antibiotic stewardship programs,<br>guideline development, official supporter of<br>the intervention program to increase impact |

254

## 255 **2. ETHICAL AND REGULATORY ASPECTS**

256 Before the study will be conducted, the protocol (including an example of the  
257 interventional material, see Appendix 1) will be submitted to a properly constituted  
258 Competent Ethics Committee (CEC).The decision of the CEC concerning the  
259 conduct of the study will be made in writing to the Sponsor-Investigator before  
260 commencement of this study.

261 The study can only begin once approval from all required authorities has been  
262 received. Any additional requirements imposed by the authorities shall be  
263 implemented.

### 264 **2.1 Study registration**

265 The trial will be registered with the trial registry of the University Hospital Basel and  
266 the U.S. National Institutes of Health ([www.clinicaltrials.gov](http://www.clinicaltrials.gov)).

### 267 **2.2 Categorization of study**

268 Category A. This is a pragmatic study based entirely on routinely collected health

269 care data that is not specifically generated for the purpose of a study. The  
270 intervention does not pose any harm to a patient as no contact with them will be  
271 necessary, only educational information that is in agreement with best current  
272 evidence of patient information and that has been reviewed by several national and  
273 international experts in the field will be provided. The patient and physician data will  
274 be anonymized.

### 275 **2.3 Competent Ethics Committee (CEC)**

276 The Sponsor-Investigator will ensure that approval from an appropriately constituted  
277 Competent Ethics Committee (CEC) is sought for the study.

278 No changes of the protocol will be implemented, unless to prevent immediate danger,  
279 without prior Sponsor and Ethics committee approval.

280 Premature study end or interruption of the study will be reported within 15 days. The  
281 regular end of the study is reported to the CEC within 90 days, the final study report  
282 shall be submitted within one year after study end. Amendments are reported  
283 according to chapter 2.10.

### 284 **2.4 Competent Authorities (CA)**

285 The protocol of this trial will be submitted to the ethical committees (EC) of the  
286 Nordwest and Zentralschweiz (Leitethikkommission) and additional approval will be  
287 sought from all remaining ECs in Switzerland. Since this trial is conducted within  
288 routine care there are no further authorities involved.

### 289 **2.5 Ethical Conduct of the Study**

290 The study will be carried out in accordance to the protocol and with principles  
291 enunciated in the current version of the Declaration of Helsinki, the guidelines of  
292 Good Clinical Practice (GCP) issued by ICH, in case of medical device: the European  
293 Directive on medical devices 93/42/EEC and the ISO Norm 14155 and ISO 14971,  
294 the Swiss Law and Swiss regulatory authority's requirements.

295 All staff involved in the pragmatic trial will have to fulfil requirements in regard to  
296 training, data management and data analysis as set by the Swiss National Science  
297 Foundation.

298 Writing of protocol and final manuscripts will be in adherence with reporting  
299 standards of SPIRIT, CONSORT and RECORD.<sup>1-3</sup>

### 300 **2.6 Declaration of interest**

301 This is an investigator-initiated trial conducted entirely with public support by the  
302 Swiss National Science Foundation within the "Nationale Forschungsprogramm  
303 'Antimikrobielle Resistenz' (NFP 72)" ([www.nfp72.ch](http://www.nfp72.ch)).

304 The sponsor of the trial is the University Hospital Basel.

### 305 **2.7 Patient Information and Informed Consent**

306 Physicians in the intervention group will not have to provide informed consent but  
307 they may opt out of participating to the trial at any time and decline receiving any of  
308 the information letters. Opting out will be possible by mail, phone, through the online  
309 service or by returning an anonymized, stamped response postcard which will have  
310 been sent to the physicians with the first feedback package. Physicians in the control  
311 group will not be notified and receive no material.

312 Investigators will take any measures to guarantee the confidentiality of all collected



313 data as the data provided by health insurers will be anonymized.

## 314 **2.8 Participant privacy and confidentiality**

315 The investigator affirms and upholds the principle of the participant's right to privacy  
316 and that they shall comply with applicable privacy laws. Especially, anonymity of the  
317 participants shall be guaranteed when presenting the data at scientific meetings or  
318 publishing them in scientific journals.

319 Individual subject medical information obtained as a result of this study is considered  
320 confidential and disclosure to third parties is prohibited. Subject confidentiality will be  
321 further ensured by utilising subject identification code numbers to correspond to  
322 treatment data in the computer files.

323 Ethics committees have guaranteed access to all original and processed data and  
324 permission to audit the project at any time (access to non-anonymized data must be  
325 authorized by CSS, Helsana, and Sanitas due to Swiss data protection law).

## 326 **2.9 Early termination of the study**

327 The Sponsor-Investigator may terminate the study prematurely according to certain  
328 circumstances, for example ethical concerns or early evidence of harm of the  
329 experimental intervention.

## 330 **2.10 Protocol amendments**

331 Substantial amendments are only implemented after approval of the CEC.

332 Under emergency circumstances, deviations from the protocol to protect the rights,  
333 safety and well-being of human subjects may proceed without prior approval of the  
334 sponsor and the CEC. Such deviations shall be documented and reported to the  
335 sponsor and the CEC as soon as possible.

336 A formal amendment to the protocol will be made for issues that may impact the  
337 conduct of the study or affect patient's benefit or harm. This includes particularity  
338 substantive changes of the objectives, design, eligibility criteria, sample size, and  
339 duration of follow up. Such major amendments will be agreed upon by the  
340 ombudsman (guardian, see 1.7) and the study investigators and approved by the  
341 ethics committee prior to implementation.

342 Minor changes that have no effect on the study conduct of primarily administrative  
343 nature will be documented in a memorandum. The investigators will inform the Ethics  
344 Committee about such minor at their discretion. All changes will be documented in  
345 the final results publication of the study.

## 346 3. BACKGROUND AND RATIONALE

### 347 3.1 Background and Rationale

348 Antibiotic resistance is an increasingly serious problem worldwide but also in Europe  
349 and Switzerland<sup>4</sup>. In many countries, resistance rates have more than doubled in the  
350 past five years<sup>5</sup>. The emergence of antibiotic resistance is associated with the  
351 increasing exposure and overall uptake of antibiotics in a population<sup>6</sup>. Experience  
352 from several European countries shows that reduced antibiotic prescribing for  
353 outpatients is paralleled by a decrease in antibiotic resistance rates for most  
354 antibiotic classes.<sup>7</sup>.

355 In Europe, 80% to 90% of antibiotics are used in primary care and the most frequent  
356 reasons for antibiotic prescribing are acute upper and lower respiratory tract  
357 infections (ARTI)<sup>8-10</sup>, although primarily of viral origin, and urinary tract infections<sup>11</sup>.  
358 Outpatient antibiotic use in Switzerland is relatively low compared to other European  
359 countries, but there is considerable variation in prescription rates between Swiss  
360 regions with a relatively high use of macrolides and fluoroquinolones, a known risk  
361 factor for antibiotic resistance, in particular for *S. pneumoniae*<sup>12</sup>.

362 To lower antibiotic prescriptions new strategies must be implemented that involve the  
363 '4 P main stakeholders', prescribers, patients, payers and public health  
364 epidemiologists. Multiple approaches of stewardship programs to lower antibiotic use  
365 in primary care have been investigated using observational designs, typically  
366 before/after studies, or randomized trials. Interventions include provider or patient  
367 information tools, provision of treatment guidelines, communication training, delayed  
368 prescriptions and point of care testing.

369 A recent Health Technology Assessment from the United States found only low to  
370 moderate quality evidence on the effectiveness of these interventions due to  
371 insufficient study designs and inconsistent intervention effects<sup>13</sup>. Most studies  
372 selected a relatively small number of practices with motivated practitioners, and were  
373 too short to assess long-term effects on antibiotic prescription rates. Only few studies  
374 reported whether reduction in antibiotic prescriptions was safe and not associated  
375 with negative impact on patient relevant outcomes. Long term consequences of the  
376 interventions were insufficiently addressed and no study addressed the  
377 consequences of the intervention on antibiotic resistance. Trials on face-to-face  
378 provider education and academic detailing showed a more consistent reduction in  
379 overall antibiotic prescribing of 4% and about 3% per year and 1000 registered  
380 patients<sup>14,15</sup>. These interventions, however, are resource intense and therefore most  
381 likely not sustainable when applied at a large scale.

### 382 3.2 Investigational Product (treatment, device) and Indication

383 The investigated intervention is a nationwide intervention within the framework of the  
384 Swiss National Science Foundation program 72 on 'Antimicrobial Resistance'  
385 combining routine prescription and antibiotic resistance feedback in addition to the  
386 provision of evidence-based physician and patient education material. For details see  
387 Section 8.1.1.

### 388 3.3 Preclinical Evidence

389 Not applicable.

### 390 3.4 Clinical Evidence to Date

391 We have conducted a systematic review to identify all randomized controlled trials

392 (RCTs) investigating the effectiveness of routine monitoring and prescription  
393 feedback to lower antibiotic prescriptions in primary care. We searched for RCTs,  
394 including cluster RCTs, evaluating antibiotic prescription feedback interventions in  
395 primary care which are implementable on a system level, i.e. not involving direct  
396 physician contact, and without combined patient directed interventions. We searched  
397 PubMed from inception to 2016 for systematic reviews on antibiotic prescription  
398 feedback interventions. The two most recent relevant reviews were perused for  
399 eligible RCTs. For the time-period not covered by these reviews, we directly queried  
400 PubMed for RCTs (i.e. from 1 January 2012 to 14 April 2016). We combined MeSH  
401 headings and text terms for “antibiotics” and “feedback” and used the PubMed  
402 standard filter for systematic reviews and a Cochrane standard filter for RCTs.

403 There are three large-scale trials evaluating feedback interventions. One found no  
404 impact on antibiotic prescriptions when two mailed feedbacks, that addressed  
405 antibiotic prescribing and prescribing of four other drug groups, were given in 1995 to  
406 unselected Australian general practitioners<sup>16</sup>. The second found that a single  
407 feedback letter sent to the top 20% antibiotic prescribing general practitioners in 2014  
408 in England reduced antibiotic prescribing by 3.3% over 6 months<sup>17</sup>.

409 The third and largest trial in this field has recently been completed by our group<sup>18</sup>.  
410 We have conducted a nationwide pragmatic trial on quarterly personalized  
411 prescription feedback to reduce antibiotic overuse in primary care (ClinicalTrials.gov  
412 identifier: NCT01773824). We randomized the 2900 primary care physicians in  
413 Switzerland with the highest antibiotics prescription rates (median of 100.6 defined  
414 daily doses (DDD) antibiotics per 100 consultations in the year before the study).  
415 Physicians in the intervention group received quarterly personalized prescription  
416 feedback by mail and were provided with secured web-based access to analyses of  
417 their individual prescription data. We used routinely collected administrative claims  
418 data of SASIS/Santésuisse.

419 We found that the intervention may reduce prescriptions to older children and  
420 adolescents aged 6 to 18 years (-8.6% in the first year; 95%CI -14.8% to -1.9%) and  
421 younger adults (-4.6%; -7.9% to -1.2% in the second year). but not in the population  
422 at large (first year 0.8%; 2.6% to 4.3%; second year 1.7%; -5.1% to 1.7%). In addition  
423 we noted no shift towards less use of broad spectrum antibiotics. Data collection for  
424 this trial ended December 31, 2015. These findings underline the feasibility of such  
425 feedback, but we need a better understanding of the effects on patient-relevant  
426 outcomes, on antibiotic resistance, and of the underlying mechanisms leading to  
427 different effects in certain subgroups of patients before routine implementation in the  
428 Swiss health care system.

### 429 **3.5 Dose Rationale / Medical Device: Rationale for the intended purpose in** 430 **study (pre-market MD)**

431 Not applicable.

### 432 **3.6 Explanation for choice of comparator (or placebo)**

433 The control intervention is the usual care in Switzerland without any changes of  
434 routine care. Thus, no intervention will be provided to the comparator group and they  
435 will not be contacted in any way. The prescription behavior of the physician in the  
436 control group will also be evaluated entirely anonymously.

### 437 **3.7 Risks / Benefits**

438 The intervention does not pose any harm to a patient as no contact with them will be

439 made, only educational information that is in agreement with best current evidence of  
440 patient information and that has been reviewed by several national and international  
441 experts in the field will be provided. The patient and physician data will be  
442 anonymized.

443 Any theoretical risk of the evaluated program would be similar to other feedback on  
444 prescribing as provided routinely for financial or economic reasons. The informed  
445 consent process in clinical trials should be tailored to the raised ethical concerns;  
446 hence we believe that patients need not to be informed of this trial without any  
447 breach in ethical standards<sup>19</sup>.

448 We also believe that in this special type of pragmatic study a disclosure of the  
449 random sampling and randomized analysis is not required because the situation is  
450 different to that of traditional clinical trials since the risks associated with the receipt  
451 of an evidence-based, guideline concordant treatment are only of theoretical nature  
452 and would be below the variability of treatment provided during the standard care.  
453 The randomization in the trial's arm does not pose an inherently higher risk than the  
454 care based on the physician's judgment.

455 As far as data protection is concern, extreme efforts and a strict use of anonymous  
456 identifiers will be placed in protecting the confidentiality of this data and any  
457 potentially associated privacy risk is so meager that informing the patients is not  
458 deemed necessary.

459 Furthermore, informing the physician or patient and making them aware of being  
460 "monitored" may introduce Hawthorne's effects not letting us to clearly evaluate if  
461 such a nationwide quality improvement program would work. This would decrease  
462 the usefulness of the trial, limit the applicability of its results by reducing the external  
463 validity and thus, reducing the benefits of this national program.

### 464 **3.8 Justification of choice of study population**

465 In Europe, 80% to 90% of antibiotics are used in primary care, thus this population is  
466 the most relevant target for initiative aiming to reduce antibiotic consumption.

467 We address the stewardship program to a random sample of the top 75% antibiotic  
468 prescribers since we believe that the public health impact and the problem of  
469 antibiotic overtreatment is low in the lowest quartile of primary care physicians.

470

471 **4. STUDY OBJECTIVES**

472 **4.1 Overall Objective**

473 To evaluate a nationwide intervention program combining routine prescription and  
474 resistance feedback with the provision of evidence-based physician and patient  
475 education material within a large-scale pragmatic randomized controlled trial in  
476 primary care physicians in Switzerland.

477 **4.2 Primary Objective**

478 To evaluate whether this program reduces the total amount of antibiotics prescribed  
479 over a longer period, i.e. after 13 to 24 months (longer term intervention effect,  
480 second year of the study).

481 **4.3 Secondary Objectives**

482 To specifically explore the impact of this program on specific patient-populations  
483 defined by age groups, on prescribing of specific types of antibiotics, on patient  
484 relevant outcomes (i.e. hospitalizations), and costs.

485 **4.4 Safety Objectives**

486 There are no specific safety objectives to be considered for this study.

487

488 **5. STUDY OUTCOMES**

489 **5.1 Primary Outcome**

490 The *primary outcome* of the trial is the overall antibiotic use, defined as prescribed  
491 defined daily doses (DDD) of antibiotics per 100 patient consultations (total patient  
492 population) evaluated over a period of 12 months, from month 13 to month 24 post  
493 randomization (longer term intervention effect).

494 **5.2 Secondary Outcomes**

495 The *secondary outcomes* are:

- 496 (1) Overall antibiotic use defined as prescribed defined daily doses (DDD) of  
497 antibiotics per 100 patient consultations evaluated over a period of 12 months,  
498 from month 1 to month 12 post randomization (short-term intervention effect);  
499 (2) Overall antibiotic use defined as prescribed defined daily doses (DDD) of  
500 antibiotics per 100 patient consultations evaluated over a period of 24 months,  
501 from month 1 to month 24 post randomization, with two repeated  
502 measurements, over the first and the second 12 month period post  
503 (3) Use of broad spectrum antibiotics in the total patient population (DDD of this  
504 specific type per 100 consultations)  
505 a. quinolones  
506 b. oral cephalosporines ;  
507 (4) Hospitalizations annual rates, defined over the period of interest as the  
508 number of patients with at least one hospitalization over the total number of  
509 patients with at least one consultation over the same period, and specifically  
510 evaluated for each physician., for the following two reasons  
511 a. all-cause  
512 b. related to infections (DRG-based)  
513 (5) Antibiotic use (DDD per 100 consultations) in four specific age groups, in  
514 patients  
515 a. <6,  
516 b. 6 to <18,  
517 c. 18 to <65,  
518 d. ≥ 65 years);

519 Secondary outcomes (3) to (6) will be evaluated over two 12 month periods, from  
520 month 1 to month 12, and from month 13 to month 24.

521 **5.3 Other Outcomes of Interest**

522 We will exploratively evaluate the specific use of macrolides, tetracyclines,  
523 aminopenicillins & amoxicillin with and without clavulanate over the first (month 1 to  
524 month 12) and second year (month 13 to month 24 after randomization). We will  
525 evaluate the costs, including costs of antibiotics, related outpatient costs, costs of  
526 hospitalizations due to infection, costs per patient with identifiable infection; overall  
527 charges of participating physicians (per consultation and per patient, across all  
528 patients) and the costs of the program.

529 **5.4 Safety Outcomes**

530 There are no safety outcomes.

531 **6. STUDY DESIGN**

532 **6.1 General study design and justification of design**

533 This is a pragmatic randomized, superiority, parallel group design trial with 2:1  
534 randomization ratio in primary care physicians in Switzerland with normal and high  
535 antibiotic prescription rates (i.e. among top 75% antibiotic prescribers). The trial is  
536 based on routinely collected individual reimbursement claims data of the three largest  
537 Swiss health insurers and on routinely collected surveillance data on antibiotic  
538 resistance. Unit of analysis and randomization is the physician.

539 **6.2 Methods of minimizing bias**

540 **6.2.1 Randomization**

541 Selected physicians will be randomized (simple randomization) in September 2017 in  
542 a 2:1 ratio to the intervention or control, using a computer-generated algorithm by a  
543 biostatistician who is not further involved in the trial. Allocation concealment is perfect  
544 due to the central enrollment and randomization in one step (not consecutive).

545 **6.2.2 Blinding procedures**

546 Physicians are formally blinded (they will not be contacted if in the control group, and  
547 unaware of the fact that this study has a randomized design with an intervention and  
548 control group).

549 The outcome assessment is formally blinded due to the nature of the routinely  
550 collected data (all data is collected not for the purpose of this study).

551 **6.2.3 Other methods of minimizing bias**

552 Physicians in the intervention group are not required to provide informed consent, but  
553 they may opt out and decline receiving any of the interventional information.  
554 Physicians in the control group will not be notified. This design maximizes the  
555 external validity and applicability of the findings and minimizes numerous biases,  
556 including the avoidance of a Hawthorne effect, i.e. behavioral changes not caused by  
557 the invention but introduced by the fact that study participants know that they are  
558 being observed. Contamination due to crossing-over effects from the core  
559 components of the intervention is almost impossible due to the centralized provision  
560 of the personalized feedback without opportunity to be shared between groups.

561 **6.3 Unblinding Procedures (Code break)**

562 Unblinding will be done when the final dataset has been provided for analysis.

563 .

564 **7. STUDY POPULATION**

565 This is a nationwide study enrolling a large proportion (in the range of 70% to 75%) of  
566 all registered primary care physicians (general internal medicine and pediatrics and  
567 adolescence medicine) treating patients insured by the three largest Swiss statutory  
568 health insurers, in an estimated number of 3.8 million Swiss residents.

569 **7.1 Eligibility criteria**

570 Participants fulfilling all of the following inclusion criteria are eligible for the study:

- 571     ▪ Primary care physician in Switzerland (FMH general internal medicine or  
572       pediatrics and adolescence medicine )
- 573     ▪ Above the 25<sup>th</sup> percentile of antibiotic prescribers (i.e. within the upper three  
574       quarters of antibiotic prescribers, with prescriptions defined as DDD/100  
575       consultations)
- 576     ▪ Consulting with at least 100 patients per year
- 577     • With individual Zahnstellenregister (ZSR) number.

578 The ZSR-number (an unique physician identifier number used for reimbursement and  
579 surveillance purposes by Santésuisse, the umbrella organization of all Swiss health  
580 insurers) in the database of health insurers. Physicians with shared, non-individual  
581 numbers, for example in hospitals, are not eligible.

582 **7.2 Recruitment and screening**

583 All physicians meeting the eligibility criteria will be identified based on reimbursement  
584 claims data over a 12-month time period preceding the randomization. A random  
585 sample of physicians will be selected for randomization.

586 **7.3 Assignment to study groups**

587 Selected physicians will be randomized to the intervention or control group.

588 **7.4 Criteria for withdrawal / discontinuation of participants**

589 Physicians in the intervention group may opt out from the trial at any stage by mail,  
590 phone, through the online service or by returning an anonymized, stamped response  
591 postcard which will have been sent to the physicians with the first feedback package.

592 They will not receive any further study material but will not be considered drop-outs  
593 and their follow-up data will remain in the intention-to-treat analysis. Physicians  
594 withdrawing from clinical practice (e.g. closing practice or retiring) remain in the study  
595 until the ZRS number is discarded.

596



## 597 8. STUDY INTERVENTION

### 598 8.1 Identity of Investigational Products (treatment / medical device)

#### 599 8.1.1 Experimental Intervention (treatment / medical device)

600 The intervention is a combined antibiotic stewardship program that has two core  
601 elements, prescription feedback and antibiotic resistance data feedback, and two  
602 supporting educational elements targeting physicians and patients. The former will be  
603 provided continuously and quarterly, while the latter are provided only once. The  
604 intervention period will be 24 months.

#### 605 ***A: Routinely provided continuous personalized prescription feedback to*** 606 ***prescribers by postal mail and online services***

607 Feedback information will be sent every three months in form of a letter  
608 including a condensed graphical overview (single page, see Appendix 1) of the  
609 most important information. We plan to show the individual amount of  
610 antibiotic prescriptions (in defined daily doses, DDD) per 100 consultations in  
611 the preceding months and display the updated and adjusted average in peer  
612 physicians (using a population-based linear regression model including  
613 adjustments for e.g. geographic region and patient-mix, i.e. age groups, sex,  
614 and comorbidities of patients).

615 The feedback will also include the number of prescribed packages, individually  
616 used antibiotic types and antibiotic resistance data from the community and  
617 served patient population.

618 Appropriate methods for feedback to pediatricians will be explored and  
619 implemented (e.g. specific display of prescribed packages in children).

620 Physicians will be invited to visit the study website via personalized access  
621 codes to receive further detailed information. There more detailed feedback  
622 information will be provided via a secured online service (the individual access  
623 codes are sent via postal mail). This will include interactive presentations of  
624 the amount of antibiotic prescriptions by type of antibiotics, age groups, sex  
625 and other patient groups (e.g. defined by comorbidities). The web-application  
626 has been developed by us and pilot-tested in the previous trial.

627 The data included in the feedback will be anonymized. We will use anonymous  
628 physician identifiers and only aggregated patient-related information is  
629 included in the feedback (for example prescription rates in age-groups).

#### 630 ***B: Educational material***

631 We will provide once educational material targeting physicians (evidence-  
632 based guidelines for conditions leading to most outpatient prescriptions in  
633 primary care) and patients (validated information material on using antibiotics  
634 wisely).

635 Evidence-based guidelines, updated and adapted for the Swiss health care  
636 context and peer-reviewed by national experts in the field (including general  
637 practitioners, pediatricians, ENT-specialists, epidemiologic and infectiologists)  
638 for the management of acute respiratory tract infections and uncomplicated  
639 urinary tract infections developed in a previous trial will be provided as paper  
640 brochure with the first mailing all physicians in the intervention group.

641 In addition, physicians in the intervention group will receive leaflets and  
642 posters to be displayed in waiting areas of practices informing patients about

643 the problems of inappropriate antibiotic use. All material will be pilot tested in  
644 practices and structured feedback from primary care physicians and their  
645 patients will be obtained.

646

647 We will provide all information in the three official languages in Switzerland, German,  
648 French, and Italian. For feasibility and cost reasons, the treatment guidelines are  
649 provided only as German and French version, because more than 90% of physicians'  
650 offices are located in the German and French speaking regions of Switzerland.

651

652 **8.1.2 Control Intervention (standard/routine/comparator treatment / medical**  
653 **device)**

654 Usual Care. Physicians in the control group receive no intervention or material.  
655 However, their anonymous prescription data is obtained and analyzed.

656 **8.1.3 Packaging, Labelling and Supply (re-supply)**

657 Not applicable

658 **8.1.4 Storage Conditions**

659 Not applicable

660 **8.2 Administration of experimental and control interventions**

661 **8.2.1 Experimental Intervention**

662 Not applicable

663 **8.2.2 Control Intervention**

664 Not applicable

665 **8.3 Dose / Device modifications**

666 Not applicable.

667 **8.4 Compliance with study intervention**

668 Not applicable.

669 **8.5 Data Collection and Follow-up for withdrawn participants**

670 The routinely collected health data in this study are used to identify the eligible  
671 physicians, provide the feedback on antibiotic prescriptions, and measure the  
672 outcomes. These data will be provided by the health insurers as standardized and  
673 continuously updated datasets containing all study-relevant information. The baseline  
674 data will contain the relevant variables for a 12-month period preceding the  
675 randomization. Datasets for the prescription feedback information are quarterly  
676 updated, and the first provision will be in September 2017.

677 Each dataset will include the most recent information for each physician included into  
678 the trial with a unique anonymous physician identifier (based on the ZSR number)  
679 uniformly provided by all three health insurers. All patients with any consultation  
680 during the trial period will be linked to the physician identifier by a unique anonymous  
681 patient identifier that will allow tracking all patients who had consultations with their  
682 primary care physician.

683 The trial database will contain the following data: number and dates of consultations,  
684 age and sex of consulting patients, prescriptions of antibiotics coded by ATC  
685 (Anatomical Therapeutic Chemical Classification-System) and date of prescription  
686 redemption, prescriptions of non-antibiotic co-medications coded by “pharmacy cost  
687 groups” (PCG, a Swiss drug classification system based on ATC codes allowing to  
688 identify 10 majors disease categories), dates and types of ambulatory laboratory  
689 tests with unique laboratory identification number (blood count, C-reactive protein,  
690 urine dipstick, urine culture, pharyngeal swab, PCR-tests for respiratory viruses),  
691 date of chest X-ray, dates of any consultations to emergency departments,  
692 ambulatories or walk-in clinics (‘Permanences’) and dates of prescribed antibiotics  
693 during such consultations, any hospitalization (with DRGs), costs for all patients with  
694 antibiotic prescriptions and hospitalization due to infections or other reasons in any  
695 patient (irrespective of the receipt of an antibiotic prescription).  
696 Antibiotics will be identified by their ATC code, and the identification of the specific  
697 drug, application form, doses and package size will be done using the swiss  
698 Spezialitätenliste.

699 **8.6 Trial specific preventive measures**

700 Not applicable.

701 **8.7 Concomitant Interventions (treatments)**

702 Not applicable.

703 **8.8 Study Drug / Medical Device Accountability**

704 Not applicable.

705 **8.9 Return or Destruction of Study Drug / Medical Device**

706 Not applicable.

707

## 708 9. STUDY ASSESSMENTS

### 709 9.1 Study flow chart(s) / table of study procedures and assessments

710 Routinely collected health data is used to identify eligible physicians, provide  
711 feedback on antibiotic prescriptions, and measure the study outcomes. These data  
712 will be provided by health insurers and will be continuously updated over the course  
713 of the study.

714 To identify eligible participants, the insurance companies (CSS, Helsana, Sanitas)  
715 will create a list, using anonymous physician identifiers, of board certified primary  
716 care physicians with FMH title in general internal medicine or paediatrics and  
717 adolescent medicine, having an individual Zahnstellenregister number and consulting  
718 with more than 100 patients in the baseline period.

719 For each potentially eligible physician, the number of prescriptions of antibiotics per  
720 patient will be determined and the top 75% of prescribers will be used as eligible  
721 participant population. From these physicians, a random sample of 2590 will be  
722 selected as the study population.

723 For all included physicians, an extended dataset with additional variables will be  
724 provided by health insurers starting from 12-month preceding study randomization.  
725 Datasets for the prescription feedback information are quarterly updated over the  
726 course of the study (see Study Flow Chart).

727 Each dataset will include the most up to date information for each physician included  
728 into the trial with a unique anonymous physician identifier, uniformly provided by all  
729 three health insurers. For patients with consultations to these physicians (using a  
730 unique anonymous patient identifier per insurance company), information on their  
731 age group (in 5 years) and sex will be included together with reimbursement data on  
732 (1) consultations, (2) prescriptions of antibiotics (coded by ATC, Anatomical  
733 Therapeutic Chemical Classification-System), (3) grouped information on  
734 prescriptions of non-antibiotic co-medications ("pharmacy cost groups", PCG, a  
735 Swiss drug classification system based on ATC codes allowing to identify 10 majors  
736 disease categories), reimbursed diagnostics tests (blood count, C-reactive protein,  
737 urine dipstick, urine culture, pharyngeal swab, PCR-tests for respiratory viruses,  
738 chest X-ray), consultations to emergency departments, ambulatories or walk-in  
739 clinics ('Permanences'), and Hospitalizations (Swiss-DRG Codes). Details about the  
740 data structure including operationalization of the outcomes and details about  
741 database linkage will be specifically defined in a routine data analysis plan developed  
742 in collaboration with the data managers of the participating insurance companies.

743

744 **Study Flow Chart**

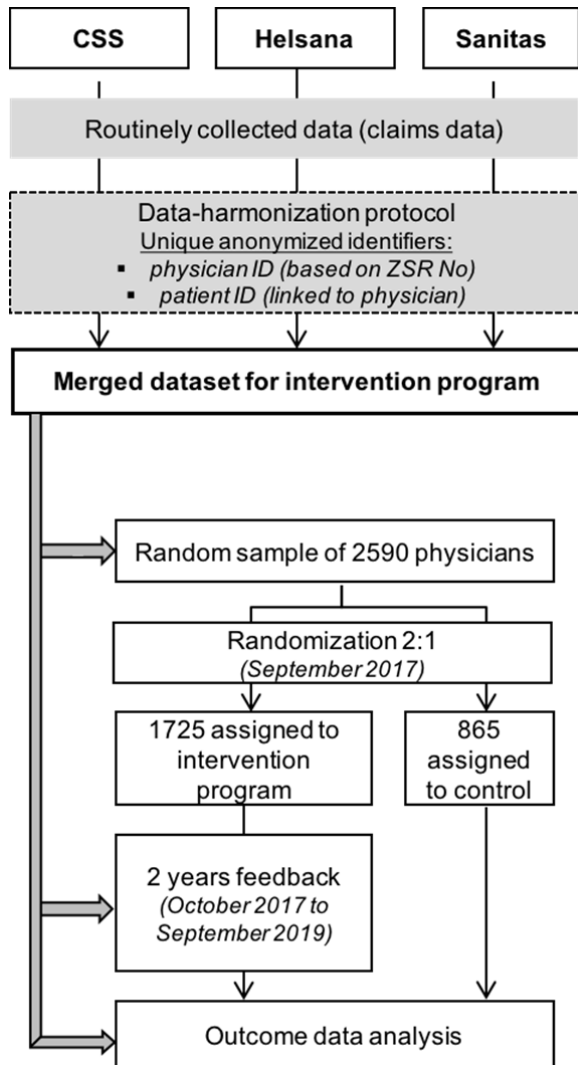

745  
746

747 **9.2 Assessments of outcomes**

748 All outcomes are measured using the routinely collected insurance claims data.

749 **Study timetable**

| Task & Month (planned start 09/2017)                      | 1 | 2 | 5 | 8 | 11 | 14 | 17 | 20 | 23 | 29 |
|-----------------------------------------------------------|---|---|---|---|----|----|----|----|----|----|
| Selection and randomization (September 2017)              | x |   |   |   |    |    |    |    |    |    |
| Provision of feedback by postal mail                      |   | x | x | x | x  | x  | x  | x  | x  |    |
| Provision of online service                               |   | x | x | x | x  | x  | x  | x  | x  |    |
| Transfer and provision of routine data by health insurers | x | x | x | x | x  | x  | x  | x  | x  | x  |
| Start of main data analysis                               |   |   |   |   |    |    |    |    |    | x  |

750 **9.2.1 Assessment of primary outcome**

751 Please refer to Section 9.1.

752 **9.2.2 Assessment of secondary outcomes**

753 Please refer to Section 9.1.

754 **9.2.3 Assessment of other outcomes of interest**

755 Not applicable.

756 **9.2.4 Assessment of safety outcomes**

757 Not applicable.

758 **9.2.5 Assessments in participants who prematurely stop the study**

759 Not applicable.

760 **9.3 Procedures at each visit**

761 Not applicable.

762

763 **10. SAFETY**

764 This trial will not utilize any pharmaceutical component, medical device or transplant  
765 material and no individual patient outcomes or adverse events will be measurable;  
766 hence, no safety measures are described.

767 **11. STATISTICAL METHODS**

768 **11.1 Hypothesis**

769 The statistical hypothesis to test is

770  $H_0: \mu_1 = \mu_0$  versus  $H_1: \mu_1 \neq \mu_0$

771 where  $\mu_1$  is the population mean of the reduction (change score) in prescribed  
772 defined daily doses (DDD) of antibiotics per 100 patient consultations in the  
773 intervention arm and  $\mu_0$  is the population mean of the reduction in the control arm  
774 (primary outcome, as defined in Section 5.1).

775 The null hypothesis  $H_0$  will be tested against the alternative  $H_1$  using ANCOVA.

776 **11.2 Determination of Sample Size**

777 We used historic monthly aggregated outpatient data from SASIS used in our  
778 previous trial to calculate the required sample size using resampling methods  
779 (bootstrapping). We aim to detect a minimum reduction of total antibiotic  
780 prescriptions by 5% in the intention to treat population with a statistical power of 90%.  
781 We deem this 5% reduction of antibiotic prescriptions a minimally public health  
782 relevant effect on a nationwide level in Switzerland. This corresponds to 3.5 DDD per  
783 100 consultations prescribed less per year in the intervention group as compared to  
784 the control. The median prescription rate of antibiotics in primary care physicians in  
785 Switzerland is estimated to be 70 DDD/100 consultations. Based on data from our  
786 previous trial, we assume that there will be physicians who opt out from the  
787 intervention (in a range of 15%) and physicians who will not change their prescription  
788 behavior. Based on these assumptions and using an intention to treat approach, we  
789 will randomize 2590 physicians in a 2:1 ratio to the intervention ( $n=1725$ ) and control  
790 group ( $n=865$ ). We plan to use an unequal allocation ratio to direct the intervention to  
791 a large proportion of the final target physician population. From a pragmatic trial  
792 perspective this approach appears reasonable given the low additional costs for  
793 recruitment, intervention, and outcome measurement. The main concern of  
794 unbalanced allocation is efficiency which may lead to a small loss of statistical power,  
795 which we have accounted for. There is a large variability of prescribing rates across  
796 physicians in this former dataset, and much of this is explained by group practices  
797 (i.e. physicians sharing ZSR numbers) which will be excluded in the current study.  
798 Therefore, the sample size calculation is a conservative estimate.

799 **11.3 Statistical criteria of termination of trial**

800 Not applicable.

801

## 802 **11.4 Planned Analyses**

### 803 **11.4.1 Datasets to be analysed, analysis populations**

804 All analyses will be conducted using the final dataset. The analysis population is all  
805 randomized physicians. All analyses will be based on the intention-to-treat principle,  
806 i.e. all participants will be analyzed in the group to which they are randomized.

807 We plan to evaluate all outcomes exploratively in the subgroup of physicians who are  
808 among the top 25% prescribers in Switzerland. No other subgroups are prespecified.

### 809 **11.4.2 Primary Analysis**

810 The effect on the primary outcome will be assessed by comparing the mean change  
811 from baseline in prescribed DDD of antibiotics per 100 patient consultations over  
812 month 13 to month 24 post randomization (primary outcome, see Section 5.1). The  
813 comparison will be performed by using ANCOVA modelling, with the outcome as  
814 response, intervention (yes/no) as factor of interest and baseline value as a covariate.  
815 Log-transformation may be applied. Other baseline covariates of interest include  
816 hospitalizations due to infection in the 12-month period preceding the randomization  
817 and comorbidities based on pharmacy cost groups. The baseline covariates will be  
818 selected prior to un-blinding of the treatment allocation. Coefficient estimates and  
819 their 95% CI will be reported.

820 All analyses will be performed by the lead trial statistician after provision of the final  
821 dataset from the health insurers. Analyses will be performed using SAS and R  
822 software.

### 823 **11.4.3 Secondary Analyses**

- 824 (1) The analysis for the secondary outcome (1) in Section [5.2](#) will be a repetition  
825 of the primary analysis for the first 12 months post randomization, where the  
826 difference between the intervention and the control arm will be again assessed  
827 by ANCOVA modelling.
- 828 (2) For outcome (2) in Section [5.2](#) the log-transformed prescribed DDD per 100  
829 consultations will be modelled via a linear mixed model on the intervention  
830 (yes/no), and including time (baseline, first year, second year) and the  
831 interaction of intervention with time. Physician random effects on the intercept  
832 and the slope will be considered. The intervention effect will be evaluated by  
833 comparing the intervention and control group. Mean percentage changes from  
834 baseline will be derived for the intervention and control groups. Other baseline  
835 covariates of interest will be included as for the primary analysis, and log-  
836 transformation may be applied. Coefficient estimates and their 95% CI will be  
837 reported.
- 838 (3) The analysis of outcome (3) in Section [5.2](#) will be a repetition of the primary  
839 analysis for two time periods, the first year post-randomization and the second  
840 year post-randomization, separately for DDD per 100 consultation of  
841 quinolones and oral cephalosporines.
- 842 (4) The rates of hospitalizations corresponding to outcomes (4a) and (4b) in  
843 Section [5.2](#) will be modelled by means of logistic regressions including the  
844 intervention as factor of interest and other relevant covariates. Hospitalization  
845 rates in the intervention and control group, with exact 95% confidence intervals  
846 will be reported, and odds ratios for the intervention arm vs control will be  
847 derived from the coefficients estimated for the logistic regression model.
- 848 (5) The analysis for outcome (5) in Section [5.2](#) is a repetition of the primary  
849 analysis separately over two time periods (first and second year post-



850 randomization) and over the following subgroups (or stratified analysis)

851 a. <6,

852 b. 6 to <18,

853 c. 18 to <65,

854 d. >= 65 years);

855 All analyses will be done by the lead trial statistician after provision of the final  
856 dataset from the health insurers. Analyses will be performed using SAS and R  
857 software

#### 858 **11.4.4 Interim analyses**

859 No interim analyses are planned.

#### 860 **11.4.5 Safety analysis**

861 No safety analyses are planned.

#### 862 **11.4.6 Deviation(s) from the original statistical plan**

863 Any relevant deviation from the original statistical plan will be reported and explained  
864 in the published study report.

#### 865 **11.5 Handling of missing data and drop-outs**

866 We expect a low amount of missing data resulting from drop-outs (based on  
867 experience with our previous trial in a range of 3%) and assume that the underlying  
868 reasons for missing data (such as discarded ZSR-numbers due to physician  
869 retirement) is completely at random. Thus we exclude these physicians from our  
870 analyses without risking biased results.

871

## 872 12. QUALITY ASSURANCE AND CONTROL

### 873 12.1 Data handling and record keeping / archiving

874 All data provided by health insurers will be anonymized to ensure confidentiality of  
875 records that could identify individual physicians and their patients. The coordinating  
876 data manager from Sanitas will use the ZSR numbers (which are centrally distributed  
877 and provided for all physicians with licenses in Switzerland by SASIS/Santésuisse) to  
878 generate unique anonymous identifiers for all included physicians.

879 A unique patient identifier will be used by the health insurers for the analysis of  
880 anonymized claims data per physician, but this identifier will not be released to the  
881 study investigators or the study staff at any time. This trial will not involve or directly  
882 collect any prospective data from individual patients. The set-up for data collection  
883 and the appropriate anonymization of data is of outmost importance to comply with  
884 data protection rules.

885 The study investigators must not know which data comes from which insurer. To  
886 ensure that the insurers are not identifiable, an independent data center which is not  
887 part of the study group and not part of the insurers will act as intermediate data  
888 operator and receive the insurance data and provide them to the investigators  
889 without any variable or marker allowing to identify the insurer. The Clinical Trial Unit  
890 University Hospital Basel will act in this function, applying all established rules of data  
891 protection and anonymization. The specified study datasets will be securely  
892 transferred in encrypted format from health insurers to the intermediate data operator  
893 who will then (after anonymizing the insurers) transfer the data to the study center at  
894 Basel Institute for Clinical Epidemiology & Biostatistics (CEB), University Hospital  
895 Basel.

896 All randomized study participants will be marked with an anonymous identifier. An  
897 encrypted list of all identifiers will be generated by each insurer and kept secure on a  
898 dedicated network directory for at least 10 years. The encryption will be done via  
899 AES-256 symmetric encryption of archive files. Respective passwords will be kept  
900 separate from the data.

901 All study data will be stored and processed on infrastructure located within the  
902 University Hospital Basel and data management will be conducted in accordance to  
903 the procedures used for trial data management by the clinical trial unit. Access to the  
904 dataset will be strictly limited to the data manager and the biostatistician of the  
905 project. To provide participants with additional information, a condensed dataset will  
906 be generated for the study website and stored on a server hosted by nine.ch.

907 All data may only be used for the study purpose. A contract between the principle  
908 investigator and health insurers will be set-up to regulate all issues of data protection  
909 and data rights. All staff of CEB involved in the trial and the director of the Institute  
910 will sign a confidentially form.

911 Postal-addresses of physicians are included in records of the health insurers. Postal  
912 anonymized feedback forms will be generated through an automated process by  
913 CEB and packing of the envelopes will be centrally executed, maintaining anonymity  
914 of randomized physicians.

915 The password protected webpage for the trial for intervention support material and  
916 guidelines will be hosted by nine.ch, a dedicated hosting company in Zurich. A  
917 virtual server and separate off-site backup will be rented for the study duration,  
918 allowing expansion of storage and computing capacity in case of need  
919 (<https://www.nine.ch/de/root/vserver/>). The trial website and respective database,

920 server and backup systems will be managed by Saccilotto Consulting, Basel,  
921 Switzerland.

### 922 **12.1.1 Case Report Forms**

923 All study data is collected in routine care and no specific CRFs are created.

### 924 **12.1.2 Specification of source documents**

925 Not applicable.

### 926 **12.1.3 Record keeping / archiving**

927 All study data will be archived for a minimum of 10 years after study termination or  
928 premature termination of the pragmatic trial.

## 929 **12.2 Data management**

930 Data management procedures will be detailed in collaboration with the health  
931 insurance providers as respective study standard operating procedures.

### 932 **12.2.1 Data Management System**

933 Health insurers will use their own data management systems to collect and process  
934 the data. The study data managers will use a relational database system in  
935 combination with custom developed programs to manage the data. All processes will  
936 be tested with dummy data before the start of the study and random samples will be  
937 manually checked as part of the quality assurance process.

### 938 **12.2.2 Data security, access and back-up**

939 Access to the data will be physically limited to study personnel and only data  
940 manager and biostatistician of the study will be given access-codes to the data.

941 The condensed data used for the study website will only be accessible to the study  
942 data-manager and will be stored on a webserver hosted by nine.ch

### 943 **12.2.3 Analysis and archiving**

944 At the end of the study all raw data, processing algorithms and analyses code will be  
945 transferred in duplicate to optical storage mediums (DVDs) and will be securely  
946 archived at the Basel Institute for Clinical Epidemiology & Biostatistics (CEB).

### 947 **12.2.4 Electronic and central data validation**

948 No data used in this study is collected for the purpose of research; therefore there is  
949 no specific data validation process. All data is collected by health insurers during  
950 routine care in usual practice.

## 951 **12.3 Monitoring**

952 No data used in this study is collected for the purpose of research; therefore there is  
953 no specific data monitoring process. Please also see Section 1.7.

## 954 **12.4 Audits and Inspections**

955 Not applicable.

## 956 **12.5 Confidentiality, Data Protection**

957 See Section 12.1.

958 **12.6 Storage of biological material and related health data**

959 The data will be stored on a dedicated physical machine and respective backup  
960 devices without internet connectivity located at the Basel Institute for Clinical  
961 Epidemiology & Biostatistic. The condensed website data will be stored on a server  
962 in Zurich, Switzerland hosted by nine.ch.

963 **13. PUBLICATION AND DISSEMINATION POLICY**

964 All trials results will be published with open access in peer-reviewed journal  
965 publications. After completion of the study a summary of the results will be send to all  
966 included general participants.

967 **14. FUNDING AND SUPPORT**

968 **14.1 Funding**

969 This study is funded by a grant from the Swiss National Science Foundation (NFP 72  
970 – Grant No NMS1927) The funding for this trial is provided by the Swiss National  
971 Science Foundation (SNSF). The insurance data is provided by CSS, Helsana, and  
972 Sanitas, free of charge.

973 **14.2 Other Support**

974 The three largest Swiss health insurers, CSS, Helsana, and Sanitas will be providing  
975 the insurance data for this trial. They will contribute with their database and assist in  
976 the successful merging and handling of this data to our research team.

977 The Swiss Medical Association (FMH, Berne), the official association of Swiss  
978 physicians, will provide official support of the intervention program to increase impact.

979 Swissnoso, the national reference center for infection prevention will provide  
980 expertise in antibiotic stewardship programs, support with scientific expertise the  
981 guideline development, and is official supporter of the intervention program to  
982 increase impact.

983 Partners are summarized in Section 1.8.

984 **15. INSURANCE**

985 Insurance will be provided by the Sponsor, the University Hospital Basel.

986 A copy of the certificate is filed in the central investigator site file and the trial master  
987 file.

988 **16. REFERENCES**

- 989 1. Benchimol EI, Smeeth L, Guttman A, et al. The REporting of studies  
990 Conducted using Observational Routinely-collected health Data (RECORD)  
991 Statement. *PLoS Medicine* 2015; **12**(10): e1001885.
- 992 2. Moher D, Hopewell S, Schulz KF. CONSORT 2010 explanation and  
993 elaboration: updated guidelines for reporting parallel group randomised trials. *BMJ*  
994 2010; **340**.
- 995 3. Chan A-W, Tetzlaff JM, Gøtzsche PC, et al. SPIRIT 2013 explanation and  
996 elaboration: guidance for protocols of clinical trials. *BMJ : British Medical Journal*  
997 2013; **346**.
- 998 4. Cars O, Hogberg LD, Murray M, et al. Meeting the challenge of antibiotic  
999 resistance. *BMJ* 2008; **337**: a1438.
- 1000 5. Malhotra-Kumar S, Lammens C, Coenen S, Van HK, Goossens H. Effect of  
1001 azithromycin and clarithromycin therapy on pharyngeal carriage of macrolide-  
1002 resistant streptococci in healthy volunteers: a randomised, double-blind, placebo-  
1003 controlled study. *Lancet* 2007; **369**(9560): 482-90.
- 1004 6. Goossens H, Ferech M, Vander Stichele R, Elseviers M, Group EP. Outpatient  
1005 antibiotic use in Europe and association with resistance: a cross-national database  
1006 study. *Lancet* 2005; **365**(9459): 579-87.
- 1007 7. Seppala H, Klaukka T, Vuopio-Varkila J, et al. The effect of changes in the  
1008 consumption of macrolide antibiotics on erythromycin resistance in group A  
1009 streptococci in Finland. Finnish Study Group for Antimicrobial Resistance. *The New*  
1010 *England journal of medicine* 1997; **337**(7): 441-6.
- 1011 8. Hawker JI, Smith S, Smith GE, et al. Trends in antibiotic prescribing in primary  
1012 care for clinical syndromes subject to national recommendations to reduce antibiotic  
1013 resistance, UK 1995-2011: analysis of a large database of primary care consultations.  
1014 *J Antimicrob Chemother* 2014; **69**(12): 3423-30.
- 1015 9. Butler CC, Hood K, Verheij T, et al. Variation in antibiotic prescribing and its  
1016 impact on recovery in patients with acute cough in primary care: prospective study in  
1017 13 countries. *BMJ* 2009; **338**: b2242.
- 1018 10. Smucny J, Fahey T, Becker L, Glazier R, McIsaac W. Antibiotics for acute  
1019 bronchitis. *Cochrane Database Syst Rev* 2000; (4): CD000245.
- 1020 11. Bates J, Thomas-Jones E, Pickles T, et al. Point of care testing for urinary  
1021 tract infection in primary care (POETIC): protocol for a randomised controlled trial of  
1022 the clinical and cost effectiveness of FLEXICULT informed management of  
1023 uncomplicated UTI in primary care. *BMC Fam Pract* 2014; **15**: 187.
- 1024 12. Achermann R, Suter K, Kronenberg A, et al. Antibiotic use in adult outpatients  
1025 in Switzerland in relation to regions, seasonality and point of care tests. *Clin Microbiol*  
1026 *Infect* 2011; **17**(6): 855-61.
- 1027 13. Drekonja DM, Filice GA, Greer N, et al. Antimicrobial stewardship in outpatient  
1028 settings: a systematic review. *Infect Control Hosp Epidemiol* 2015; **36**(2): 142-52.
- 1029 14. Butler CC, Simpson SA, Dunstan F, et al. Effectiveness of multifaceted  
1030 educational programme to reduce antibiotic dispensing in primary care: practice  
1031 based randomised controlled trial. *BMJ* 2012; **344**: d8173.
- 1032 15. Gjelstad S, Høy S, Straand J, Brekke M, Dalen I, Lindbaek M. Improving  
1033 antibiotic prescribing in acute respiratory tract infections: cluster randomised trial

- 1034 from Norwegian general practice (prescription peer academic detailing (Rx-PAD)  
1035 study). *BMJ* 2013; **347**: f4403.
- 1036 16. O'Connell DL, Henry D, Tomlins R. Randomised controlled trial of effect of  
1037 feedback on general practitioners' prescribing in Australia. *BMJ* 1999; **318**(7182):  
1038 507-11.
- 1039 17. Hallsworth M, Chadborn T, Sallis A, et al. Provision of social norm feedback to  
1040 high prescribers of antibiotics in general practice: a pragmatic national randomised  
1041 controlled trial. *Lancet* 2016.
- 1042 18. Hemkens LG, Saccilotto R, Reyes SL, et al. Personalized prescription  
1043 feedback to reduce antibiotic overuse in primary care: rationale and design of a  
1044 nationwide pragmatic randomized trial. *BMC Infectious Diseases* 2016; **16**: 421.
- 1045 19. Macklin R, Shepherd L. Informed consent and standard of care: what must be  
1046 disclosed. *Am J Bioeth* 2013; **13**(12): 9-13.
- 1047

1048 17. APPENDIX

1049 Appendix 1: Example of the intervention material: Prescription feedback to  
 1050 physicians

### RÜCKMELDUNG ZU IHRER ANTIBIOTIKA-VERSCHREIBUNG

Auf dieser Seite werden verschiedene Informationen zu Ihren Antibiotika-Verschreibungen während der vergangenen Monate präsentiert. Quelle der Daten ist der Tarifpool der SASIS AG.

Aufgrund einer Latenz bei der Datenerhebung können keine Informationen zu den letzten sechs Monaten präsentiert werden.

- Rate der Antibiotika-Verschreibungen als DDD (=defined daily dose) (Details dazu auf der Studienwebseite)
- Anzahl Patienten, welche für den jeweiligen Monat im Datensatz vorhanden sind
- Anzahl Konsultationen, die für den jeweiligen Monat gezählt wurden (Tarmed Position 00.0010: Konsultation, erste 5 Min.)
- Altersverteilung der Patienten  
 Kinder 0 - 15 Jahre  
 Erwachsene 16 - 65 Jahre  
 Senioren 66+ Jahre
- Verteilung der Geschlechter  
 ■ Frauen ■ Männer

Details zur Berechnung der Verschreibungsrate, weiterführende Informationen und detaillierte Statistiken zu jedem Monat finden Sie auf der unten angegebenen Studienwebseite.

[www.quality.evibox.ch](http://www.quality.evibox.ch)

PERSÖNLICHE ID \*\*\*\*\*

PASSWORT \*\*\*\*\*

#### IHRE ANTIBIOTIKA-VERSCHREIBUNGSRATEN UNTER BERÜCKSICHTIGUNG IHRES PATIENTENPROFILS

**Legende:**  
 ■ Ihre aktuelle persönliche Verschreibungsrate  
 ■ Ihre persönliche Verschreibungsrate im Vorjahr  
 ● Aktuelle durchschnittliche Verschreibungsrate aller Ärzte im Datensatz (Median)  
 ○ Durchschnittliche Verschreibungsrate aller Ärzte im Vorjahr (ab Dezember 2013)

#### INFORMATIONEN ZU IHREN ANTIBIOTIKA-VERSCHREIBUNGEN IM 1. QUARTAL 2014

|                                                         |                                                                                    |                                                                               |                                                   |
|---------------------------------------------------------|------------------------------------------------------------------------------------|-------------------------------------------------------------------------------|---------------------------------------------------|
| <b>PATIENTEN</b><br>👤 376                               | <b>KONSULTATIONEN</b><br>🗨️ 269                                                    | <b>VERSCHREIBUNGEN</b><br>📝 147 DDD                                           | <b>TREND IHRER VERSCHREIBUNGEN</b><br>📉 FALLEND   |
| <b>ANTEIL KINDER</b><br>4% 0-15 Jahre                   | <b>ANTEIL ERWACHSENE</b><br>71% 16-65 Jahre                                        | <b>ANTEIL SENIOREN</b><br>25% 65+ Jahre                                       | <b>GESCHLECHTSVERTEILUNG</b><br>■ Frauen ■ Männer |
| <b>ANZAHL ÄRZTE IN DER VERGLEICHSPOPULATION</b><br>4994 | <b>DIE DURCHSCHNITTLICHE VERSCHREIBUNGSRATE</b><br>71.6 DDD PRO 100 KONSULTATIONEN | <b>IHRE PERSÖNLICHE VERSCHREIBUNGSRATE</b><br>25.4 DDD PRO 100 KONSULTATIONEN |                                                   |

**ANTEIL DER ANTIBIOTIKA-VERSCHREIBUNGEN PRO ATC-GRUPPE**

1051  
 1052

CEB-NFP72, Version 1.1 July 12<sup>th</sup> 2017

Page 40 of 40



12  
13  
14

**Prüfplan/Protokoll HFV: Weiterverwendung biologischen Materials und/oder  
gesundheitsbezogener Personendaten für die Forschung bei fehlender Einwilligung und  
Information nach Artikel 34 HFG**

15

**Title**

16 Routine antibiotic prescription and resistance feedback in primary care: A nationwide pragmatic  
17 randomized controlled trial

18

**Project leader**

19 Prof. Heiner C. Bucher, MD MPH  
20 Basel Institute for Clinical Epidemiology and Biostatistics (ceb)  
21 University Hospital Basel, Spitalstrasse 12  
22 CH-4031 Basel, Switzerland  
23 Phone +41 61 556 5100; Fax +41 61 265 3109  
24 Email: heiner.bucher@usb.ch

25

**Confirmation**

26 By submitting my signature, I confirm that all the data contained in this action plan are correct  
27 and I am committed to respecting the data provided and national legislation, in particular  
28 regarding data protection.

Basel, April 2<sup>nd</sup> 2020

---

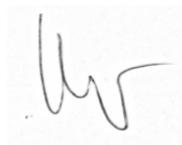

## 29 Abbreviations

|    |                |                                                                              |
|----|----------------|------------------------------------------------------------------------------|
| 30 | 4P             | Prescribers, patients, payers and public health epidemiologists              |
| 31 | AE             | Adverse Event                                                                |
| 32 | ARTI           | Acute upper and lower respiratory tract infections                           |
| 33 | ATC            | Anatomical Therapeutic Chemical Classification System                        |
| 34 | CA             | Competent Authority (e.g. Swissmedic)                                        |
| 35 | CEC            | Competent Ethics Committee                                                   |
| 36 | CRF            | Case Report Form                                                             |
| 37 | ClinO          | Ordinance on Clinical Trials in Human Research (in German: KlinV, in French: |
| 38 | OClin)         |                                                                              |
| 39 | DRG            | Diagnosis-related group                                                      |
| 40 | eCRF           | Electronic Case Report Form                                                  |
| 41 | FMH            | Foederatio Medicorum Helveticorum                                            |
| 42 | GCP            | Good Clinical Practice                                                       |
| 43 | IB             | Investigator's Brochure                                                      |
| 44 | H <sub>0</sub> | Null hypothesis                                                              |
| 45 | H <sub>1</sub> | Alternative hypothesis                                                       |
| 46 | HFG            | Humanforschungsgesetz (Law on human research)                                |
| 47 | IMP            | Investigational Medicinal Product                                            |
| 48 | ISO            | International Organisation for Standardisation                               |
| 49 | ITT            | Intention to treat                                                           |
| 50 | KlinV          | Verordnung über klinische Versuche in der Humanforschung (in English: ClinO, |
| 51 |                | in French OClin)                                                             |
| 52 | MD             | Medical Device                                                               |
| 53 | OClin          | Ordonnance sur les essais cliniques dans le cadre de la recherche sur l'être |
| 54 |                | humain (in German : KlinV, in English : ClinO)                               |
| 55 | PI             | Principal Investigator                                                       |
| 56 | RCT            | Randomized controlled trial                                                  |
| 57 | SOP            | Standard Operating Procedure                                                 |
| 58 | SPC            | Summary of product characteristics                                           |
| 59 | ZSR            | Zahlstellenregister                                                          |
| 60 |                |                                                                              |

## 61 Background

62 Antibiotic resistance is an increasingly serious problem worldwide but also in Europe and  
63 Switzerland<sup>1</sup>. In many countries, resistance rates have more than doubled in the past five  
64 years<sup>2</sup>. The emergence of antibiotic resistance is associated with the increasing exposure and  
65 overall uptake of antibiotics in a population<sup>3</sup>. Experience from several European countries  
66 shows that reduced antibiotic prescribing for outpatients is paralleled by a decrease in antibiotic  
67 resistance rates for most antibiotic classes<sup>4</sup>.

68 In Europe, 80% to 90% of antibiotics are used in primary care and the most frequent reasons for  
69 antibiotic prescribing are acute upper and lower respiratory tract infections (ARTI)<sup>5-7</sup>, although  
70 primarily of viral origin, and urinary tract infections<sup>8</sup>. Outpatient antibiotic use in Switzerland is  
71 relatively low compared to other European countries, but there is considerable variation in

72 prescription rates between Swiss regions with a relatively high use of macrolides and  
73 fluoroquinolones, a known risk factor for antibiotic resistance, in particular for *S. pneumoniae*<sup>9</sup>.  
74 To lower antibiotic prescriptions new strategies must be implemented that involve the '4 P main  
75 stakeholders', prescribers, patients, payers and public health epidemiologists. Multiple  
76 approaches of stewardship programs to lower antibiotic use in primary care have been  
77 investigated using observational designs, typically before/after studies, or randomized trials.  
78 Interventions include provider or patient information tools, provision of treatment guidelines,  
79 communication training, delayed prescriptions and point of care testing.  
80 A recent Health Technology Assessment from the United States found only low to moderate  
81 quality evidence on the effectiveness of these interventions due to insufficient study designs  
82 and inconsistent intervention effects<sup>10</sup>. Most studies selected a relatively small number of  
83 practices with motivated practitioners, and were too short to assess long-term effects on  
84 antibiotic prescription rates. Only few studies reported whether reduction in antibiotic  
85 prescriptions was safe and not associated with negative impact on patient relevant outcomes.  
86 Long term consequences of the interventions were insufficiently addressed and no study  
87 addressed the consequences of the intervention on antibiotic resistance. Trials on face-to-face  
88 provider education and academic detailing showed a more consistent reduction in overall  
89 antibiotic prescribing of 4% and about 3% per year and 1000 registered patients<sup>11,12</sup>. These  
90 interventions, however, are resource intense and therefore most likely not sustainable when  
91 applied at a large scale.

92  
93 The investigated intervention is a nationwide intervention within the framework of the Swiss  
94 National Science Foundation program 72 on 'Antimicrobial Resistance' combining routine  
95 prescription and antibiotic resistance feedback in addition to the provision of evidence-based  
96 physician and patient education material.

97  
98 We have conducted a systematic review to identify all randomized controlled trials (RCTs)  
99 investigating the effectiveness of routine monitoring and prescription feedback to lower antibiotic  
100 prescriptions in primary care. We searched for RCTs, including cluster RCTs, evaluating  
101 antibiotic prescription feedback interventions in primary care which are implementable on a  
102 system level, i.e. not involving direct physician contact, and without combined patient directed  
103 interventions. We searched PubMed from inception to 2016 for systematic reviews on antibiotic  
104 prescription feedback interventions. The two most recent relevant reviews were perused for  
105 eligible RCTs. For the time-period not covered by these reviews, we directly queried PubMed  
106 for RCTs (i.e. from 1 January 2012 to 14 April 2016). We combined MeSH headings and text  
107 terms for "antibiotics" and "feedback" and used the PubMed standard filter for systematic  
108 reviews and a Cochrane standard filter for RCTs.

109 There are three large-scale trials evaluating feedback interventions. One found no impact on  
110 antibiotic prescriptions when two mailed feedbacks, that addressed antibiotic prescribing and  
111 prescribing of four other drug groups, were given in 1995 to unselected Australian general  
112 practitioners<sup>13</sup>. The second found that a single feedback letter sent to the top 20% antibiotic  
113 prescribing general practitioners in 2014 in England reduced antibiotic prescribing by 3.3% over  
114 6 months<sup>14</sup>.

115  
116 The third and largest trial in this field has recently been completed by our group<sup>15</sup>. We have  
117 conducted a nationwide pragmatic trial on quarterly personalized prescription feedback to  
118 reduce antibiotic overuse in primary care (ClinicalTrials.gov identifier: NCT01773824). We  
119 randomized the 2900 primary care physicians in Switzerland with the highest antibiotics  
120 prescription rates (median of 100.6 defined daily doses antibiotics per 100 consultations in the

121 year before the study). Physicians in the intervention group received quarterly personalized  
122 prescription feedback by mail and were provided with secured web-based access to analyses of  
123 their individual prescription data. We used routinely collected administrative claims data of  
124 SASIS/Santésuisse.

125 We found that the intervention may reduce prescriptions to older children and adolescents aged  
126 6 to 18 years (-8.6% in the first year; 95%CI -14.8% to -1.9%) and younger adults (-4.6%; -7.9%  
127 to -1.2% in the second year). but not in the population at large (first year 0.8%; 2.6% to 4.3%;  
128 second year 1.7%; -5.1% to 1.7%). In addition we noted no shift towards less use of broad  
129 spectrum antibiotics. Data collection for this trial ended December 31, 2015. These findings  
130 underline the feasibility of such feedback, but we need a better understanding of the effects on  
131 patient-relevant outcomes, on antibiotic resistance, and of the underlying mechanisms leading  
132 to different effects in certain subgroups of patients before routine implementation in the Swiss  
133 health care system.

## 134 **Objectives**

135 Overall Objective: To evaluate a nationwide intervention program combining routine prescription  
136 and resistance feedback with the provision of evidence-based physician and patient education  
137 material within a large-scale pragmatic randomized controlled trial in primary care physicians in  
138 Switzerland.

139 Primary Objective: To evaluate whether this program reduces the total amount of antibiotics  
140 prescribed over a longer period, i.e. after 13 to 24 months (longer term intervention effect,  
141 second year of the study).

142 Secondary Objectives: To specifically explore the impact of this program on specific patient-  
143 populations defined by age groups, on prescribing of specific types of antibiotics, on patient  
144 relevant outcomes (i.e. hospitalizations), and costs.

145  
146 Data-linkage substudy - Objective

147 To assess the association of antibiotic resistance and antibiotic use on patients with urinary  
148 tract infections (UTI) using linked data. Data linkage will be done between routinely collected  
149 claims data and the ANRESIS database.

## 150 **Design and Outcomes**

151 This is a pragmatic randomized, superiority, parallel group design trial with 1:1 randomization  
152 ratio in 3426 primary care physicians in Switzerland with high antibiotic prescription rates (i.e.  
153 among top 75% antibiotic prescribers). The trial is entirely based on routinely collected  
154 individual reimbursement claims data of the three largest Swiss health insurers using  
155 anonymized identifiers of physicians and patients and on routinely collected surveillance data  
156 on antibiotic resistance. Unit of analysis and randomization is the physician.

157

158 Primary outcome:

159 Overall antibiotic use, defined as prescribed antibiotics (based on packaged prescriptions  
160 derived from ATC codes) per 100 patient consultations (total patient population) evaluated over  
161 a period of 12 months, from month 13 to month 24 post randomization (longer term intervention  
162 effect).

163

164 Secondary outcomes:

- 165 (1) Overall antibiotic use defined as prescribed antibiotics per 100 patient consultations  
166 evaluated over a period of 12 months, from month 1 to 12 post randomization (short-term  
167 intervention effect);
- 168 (2) Overall antibiotic use defined as prescribed antibiotics per 100 patient consultations  
169 evaluated over a period of 24 months, from month 1 to month 24 post randomization, with two  
170 repeated measurements, over the first and the second 12 month period post randomization;
- 171 (3) Use of broad spectrum antibiotics in the total patient population (per 100 consultations)  
172 a. quinolones  
173 b. oral cephalosporines ;
- 174 (4) Hospitalizations rates  
175 a. all-cause  
176 b. related to infections (DRG-based definition)
- 177 (5) Antibiotic use (per 100 consultations) in four specific age groups, in patients  
178 a. <6 years  
179 b. 6 to <18 years  
180 c. 18 to <65 years  
181 d. ≥ 65 years
- 182 (6) Secondary outcomes (3) to (5) will be evaluated over two 12 month periods (from month 1  
183 to month 12, and from month 13 to month 24).

184

185 Data-linkage substudy – Design and outcomes

186 We will use the privacy-preserving probability record linkage (P3RL) methodology to link the  
187 data-sets<sup>16</sup>. The linkage substudy will be limited to urinary tract infections and antibiotic  
188 resistance to amoxicillin-clavulanic acid, fosfomycin, nitrofurantoin trimethoprim-  
189 sulfamethoxazole, and fluoroquinolones.

190 Primary outcome:

191 (7) To explore any association of antibiotic resistance in urine samples from patients with  
192 potential risk factors. This analysis will allow us to evaluate for the first time the assessment of  
193 risk factors that may affect antibiotic resistance in urinary tract infections on the patient level in a  
194 nationwide population study.

195 Secondary outcome:

196 (8) To evaluate exploratively whether a reduction of antibiotic use observed in the  
197 nationwide intervention trial is associated with a reduction in antibiotic resistance in this  
198 subpopulation (e.g., lower rates of antibiotic resistance for the large-spectrum antibiotics across  
199 all patients with samples in the intervention group versus the control group over the first and  
200 second year of the study).

## 201 **Origin of the data/material**

202 We plan to use the same data for this study that is routinely used for reimbursement of medical  
203 treatments and services by the three largest Swiss health insurers Helsana, CSS, and Sanitas.  
204 There is no data specifically collected for the purpose of this study.

205 All data used by and provided to the investigators that are related to physicians or patients are  
206 encrypted using anonymized identifiers by the data managers of the collaborating insurers.

207

208 Data-linkage substudy:

209 ANRESIS is a national antimicrobial resistance surveillance system collecting data from 30  
210 laboratories in Switzerland. Similar to the claims data, all data related to physicians or patients  
211 will be encrypted by the data manager of ANRESIS. The privacy-preserving probability record  
212 linkage (P3RL) process requires the anonymization of specific matching variables (e.g., ZSR  
213 numbers, date of sampling, etc.), those matching variable will also be encrypted. Hence, no

214 data will be made available to the investigators that might allow identifying an individual  
215 physician or patient.

## 216 **Inclusion criteria**

217 We plan to include and use data from

- 218     ▪ Primary care physicians in Switzerland board certified with FMH title in general internal  
219         medicine or paediatrics & adolescent medicine who are
- 220     ▪ above the 25<sup>th</sup> percentile of antibiotic prescribing and are
- 221     ▪ consulting with at least 100 patients per year and who have a
- 222     ▪ individual Zahnstellenregister (ZSR) number.

## 223 **Exclusion criteria**

224 There are no exclusion criteria.

## 225 **For what personal health data / biological material is the authorization released** 226 **for?**

227 Physician prescription data originating from the insurance company databases will be analyzed,  
228 together with the corresponding data from the respective patient. The patient data will be  
229 anonymized directly from the insurance company, so that it will not be possible for the  
230 researchers to ascertain the identity of these patients nor of the physicians, but only to know the  
231 patient-physician linkage for those physician included in the intervention arm.

232 We would need basic information – using anonymous/encrypted patient-identifiers on:

- 233     ▪ prescribing physician (canton, if pediatrician or general practitioner, if possibly working in  
234         a group office, “Gruppenpraxis”)
- 235     ▪ consulted patient (canton, age-group in 5 years, if adult or children (below 18 years),  
236         gender, health insurer) with basic tarmed and “Analyse-Liste” positions (consultation  
237         date, which respiratory-tract or urinary-tract related diagnostic procedures or  
238         examinations were conducted), pharmacy-cost-group, prescription of antibiotics to this  
239         patients (date, amount, and ATC-code) and hospitalization information (if hospitalized  
240         and the date, duration, and type of infection-related DRG-code).

241  
242 Data-linkage substudy:

243 In addition to the information listed above, antibiotic resistance to amoxicillin-clavulanic acid,  
244 fosfomycin, nitrofurantoin, trimethoprim-sulfamethoxazole, and fluoroquinolones from urine  
245 samples will be released to the investigators.

## 246 **Motivation for the submission of informed consent waiver by the Ethics** 247 **Committee**

248 The intervention we aim to explore is similar to information campaigns in other countries where  
249 routinely prescribing feedback is given outside of a research setting, also based entirely on  
250 routine data from insurers. Guidelines and information material for patients are also routinely  
251 provided to general practitioners outside of research settings without any consideration of any  
252 theoretical risks. Such programs are commonly implemented without any ethical concerns.  
253

254 We would like to scientifically evaluate the value of implementing such a program under real-life  
255 conditions with support of national physician associations and the national science foundation in  
256 the framework of a nationwide campaign to address the substantial public health threat of  
257 antibiotic resistance.

258 Since the physician intervention relies on a behavioral and information component it is not  
259 feasible to inform all physicians of the details of the study (i.e. they are able to opt out, but are  
260 not aware specifically that their antibiotic prescription behavior will be assessed). If we asked  
261 them for informed consent, we would not be able to determine whether the feedback is  
262 effective, as the physicians could change the behavior by knowing that we would be observing  
263 them. This would make it impossible to understand the real value of such an antibiotic  
264 stewardship program.

265 Regarding the patients, it would be highly unfeasible to identify, contact and inform all of the  
266 patients in entire Switzerland seen by these more than 3426 physicians, also because they are  
267 not aware of the study details and this may again considerably change and affect the  
268 intervention and destroy the concept of a “real world control group”.

269 These arguments also apply for the Data-linkage substudy.

270 This study will allow determining if prescription guidelines and feedback on antibiotic therapy  
271 are effective in reducing the rates of antibiotic resistance, which will benefit the entire Swiss  
272 population.

### 273 **Confirmation that there will be no documented refusal**

274 The project-leader confirms that no health-related individual data and no biological data will be  
275 used if there is a written or documented oral refusal by the respective person.

276

277 Any physician in the intervention group, upon receipt of their guideline and feedback package,  
278 has at any time-point the ability to anonymously opt out and to decline receiving any further  
279 information material. We will stop sending the information and not contact this person in any  
280 way so that this remains the usual care setting. We will analyze the anonymous routinely  
281 collected data for the purpose of conducting an intention-to-treat analysis to ensure internal  
282 validity of the trial.

### 283 **Which individuals are allowed to transmit biological material and personal health 284 data?**

285 There will be no personal data that is not anonymized in this trial. All data provided by health  
286 insurers or ANRESIS will be anonymized to ensure confidentiality of records that could identify  
287 individual physicians and their patients, or laboratories.

### 288 **Who is responsible for receiving the data / material in question?**

289 No personal data that is not anonymized will be used in this trial by the investigators, all data  
290 provided by health insurers or ANRESIS will be anonymized.

### 291 **Who, in the context of this research project, will be authorized to access personal 292 health data and / or biological material?**

293 Please see section above, this trial will not involve any data that is not anonymized after being  
294 processed by the health insurers or ANRESIS.

## 295 **Who is responsible for the protection of the communicated data?**

296 Prof. Heiner C. Bucher, MD MPH  
297 Basel Institute for Clinical Epidemiology and Biostatistics (CEB) University Hospital Basel,  
298 Spitalstrasse 12  
299 CH-4031 Basel, Switzerland  
300 Phone +41 61 556 5100; Fax +41 61 265 3109  
301 Email: heiner.bucher@usb.ch

302

## 303 **Scientific Methodology**

304 The statistical hypothesis to test is  $H_0: \mu_1 = \mu_0$  versus  $H_1: \mu_1 \neq \mu_0$

305 Where  $\mu_1$  is the population mean of the reduction (change score) in prescribed antibiotics per  
306 100 patient consultations in the intervention arm and  $\mu_0$  is the population mean of the reduction  
307 in the control arm (primary outcome).

308 The null hypothesis  $H_0$  will be tested against the alternative  $H_1$  using ANCOVA.

309 In 2016, the baseline year, the inclusion criteria were fulfilled by 3646 physicians. The standard  
310 deviation of the prescription rate in the target population can be evaluated based on the data  
311 from the baseline year (2016), which is 0.059 on the raw scale and 0.438 on the log scale.

312

### 313 *Power analysis based on bootstrapping:*

314 Because another trial with the same target population was planned by CEB and to avoid any  
315 potential interference with the present trial (Benchmark II), 220 physicians were excluded from  
316 the eligible pool of physicians around the Basel region (BS, BL, AG, SO). Therefore, 3426  
317 physicians remain to be randomized, i.e. 1713 physicians per arm in a 1:1 randomization ratio.  
318 The power analysis is based on a trial simulation from 50 bootstrap samples extracted from the  
319 pool of physicians to randomize. For each bootstrap sample we simulate a trial where we apply  
320 the effect we expect to observe in the treatment arm, also accounting for a 15% failure to  
321 respond, and for each sample we then test the difference by means of a Mann Whitney U test  
322 (Wilcoxon rank sum). Hence we evaluate the power for each bootstrap sample, and derive  
323 median and confidence intervals from the empirical distribution, which gives as an estimated  
324 power of: median: 0.93, 95% CI: 0.90 to 0.96.

325

### 326 *Data-linkage substudy:*

327 The direct association between bacterial resistance and antibiotic use will be assessed with a  
328 multilevel mixed logistic regression model adjusting for clustering by physicians. Further  
329 descriptive analyses will be performed to show associations between the antibiotic prescription  
330 rates of the GPs and the emergence of bacterial resistance. The analyses will also explore  
331 regional or patient age-group specific differences and whether a potential intervention effect of  
332 the intervention trial on antibiotic prescribing rate also impacted the emergence of bacterial  
333 resistance.

## 334 **Obligation of notification**

335 A change in the methods of the project, as well as the changes to the indications mentioned in  
336 the authorization, must be notified in advance to the competent ethics committee.



337 The conclusion or termination of the research project must be notified to the Ethics Committee  
338 within 90 days.

339 After completion of the study, a summary of the results will be sent to all included general  
340 participants.

#### 341 **Protection of data: encryption and preservation**

342 All data provided by health insurers and ANRESIS will be anonymized to ensure the  
343 confidentiality of records that could identify individual physicians and their patients. The  
344 coordinating data manager from Sanitas will use the ZSR numbers (which are centrally  
345 distributed and provided for all physicians with licenses in Switzerland by SASIS/Santésuisse)  
346 to generate unique anonymous identifiers for all included physicians.

347 A unique patient identifier will be used by the health insurers for the analysis of anonymized  
348 claims data per physician, but this identifier will not be released to the study investigators or the  
349 study staff at any time. This trial will not involve or directly collect any prospective data from  
350 individual patients. The set-up for data collection and the appropriate anonymization of data is  
351 of outmost importance to comply with data protection rules.

352 All randomized study participants will be marked with an anonymous identifier. An encrypted list  
353 of all identifiers will be generated by each insurer and kept secure on a dedicated network  
354 directory for at least 10 years. The encryption will be done via AES-256 symmetric encryption of  
355 archive files. Respective passwords will be kept separate from the data.

356  
357 The study investigators must not know which data comes from which insurer. To ensure that the  
358 insurers are not identifiable, an independent data center which is not part of the study group and  
359 not part of the insurers will act as intermediate data operator and receive the insurance data  
360 and provide them to the investigators without any variable or marker allowing to identify the  
361 insurer. The Clinical Trial Unit University Hospital Basel will act in this function, applying all  
362 established rules of data protection and anonymization.

363 The specified study datasets will be securely transferred in encrypted format from health  
364 insurers to the intermediate data operator who will then (after anonymizing the insurers) transfer  
365 the data to the study center at Basel Institute for Clinical Epidemiology & Biostatistics (CEB),  
366 University Hospital Basel.

367 Data-linkage substudy:

368 The privacy-preserving probability record linkage (P3RL) process requires an additional step to  
369 generate a link table. In the linkage process, data managers from the health insurances and  
370 ANRESIS will provide the encrypted matching variables (ZSR number, date of sampling, or date  
371 of sample arrival in the laboratory with ordered urine cultures). The linkage will be done using  
372 this information, and the link table will then be sent to the investigators of CEB, which allows  
373 identifying matched entries in the databases from the health insurers and ANRESIS.

#### 374 **Procedure in case of unencrypted / non-anonymous data**

375 Not applicable, as no un-encrypted/non-anonymous personal data will be used in this trial.

#### 376 **Data storage information**

377 The specified study datasets will be securely transferred in encrypted format from health  
378 insurers and ANRESIS to the intermediate data operator who will then (after anonymizing the  
379 insurers) transfer the data to the study center at Basel Institute for Clinical Epidemiology &  
380 Biostatistics (CEB), University Hospital Basel. All study data will be stored and processed on  
381 infrastructure located within the University Hospital Basel and the University of Basel. Data  
382 management will be conducted in accordance with the procedures used for trial data  
383 management by the clinical trial unit. Data processing and analysis will be done using the  
384 sciCORE infrastructure from the University of Basel. Access to the dataset will be strictly limited  
385 to the data manager and the biostatistician of the project.  
386 All data may only be used for the study purpose. A contract between the principle investigator,  
387 health insurers and ANRESIS will be set-up to regulate all issues of data protection and data  
388 rights. All staff of CEB involved in the trial and the director of the Institute will sign a  
389 confidentially form.  
390 Postal-addresses of physicians are included in records of the health insurers. Postal  
391 anonymized feedback forms will be generated through an automated process by CEB and  
392 packing of the envelopes will be centrally executed, maintaining anonymity of randomized  
393 physicians.  
394 The password protected webpage for the trial for intervention support material and guidelines  
395 will be hosted by nine.ch, a dedicated hosting company in Zurich. A virtual server and separate  
396 off-site backup will be rented for the study duration, allowing expansion of storage and  
397 computing capacity in case of need (<https://www.nine.ch/de/root/vserver/>). The trial website and  
398 respective database, server and backup systems will be managed by Saccilotto Consulting,  
399 Basel

#### 400 **Duration of data storage**

401 All study data will be archived for a minimum of 10 years after study termination or premature  
402 termination of the pragmatic trial.

#### 403 **Ethical and regulatory requirements**

404 This project meets the regulatory requirements of LRUM and ORU and has been approved by  
405 the Ethics Committee.

406

407 **References**

408

- 409 1. Cars O, Hogberg LD, Murray M, et al. Meeting the challenge of antibiotic resistance.  
410 *BMJ* 2008; **337**: a1438.
- 411 2. Malhotra-Kumar S, Lammens C, Coenen S, Van HK, Goossens H. Effect of  
412 azithromycin and clarithromycin therapy on pharyngeal carriage of macrolide-resistant  
413 streptococci in healthy volunteers: a randomised, double-blind, placebo-controlled study.  
414 *Lancet* 2007; **369**(9560): 482-90.
- 415 3. Goossens H, Ferech M, Vander Stichele R, Elseviers M, Group EP. Outpatient  
416 antibiotic use in Europe and association with resistance: a cross-national database study.  
417 *Lancet* 2005; **365**(9459): 579-87.
- 418 4. Seppala H, Klaukka T, Vuopio-Varkila J, et al. The effect of changes in the  
419 consumption of macrolide antibiotics on erythromycin resistance in group A streptococci  
420 in Finland. Finnish Study Group for Antimicrobial Resistance. *The New England journal of*  
421 *medicine* 1997; **337**(7): 441-6.
- 422 5. Hawker JI, Smith S, Smith GE, et al. Trends in antibiotic prescribing in primary care  
423 for clinical syndromes subject to national recommendations to reduce antibiotic resistance,  
424 UK 1995-2011: analysis of a large database of primary care consultations. *J Antimicrob*  
425 *Chemother* 2014; **69**(12): 3423-30.
- 426 6. Butler J, Kalogeropoulos A. Registries and health care quality improvement. *J Am*  
427 *Coll Cardiol* 2009; **54**(14): 1290-2.
- 428 7. Smucny J, Fahey T, Becker L, Glazier R, McIsaac W. Antibiotics for acute bronchitis.  
429 *Cochrane Database Syst Rev* 2000; (4): CD000245.
- 430 8. Bates J, Thomas-Jones E, Pickles T, et al. Point of care testing for urinary tract  
431 infection in primary care (POETIC): protocol for a randomised controlled trial of the  
432 clinical and cost effectiveness of FLEXICULT informed management of uncomplicated UTI  
433 in primary care. *BMC Fam Pract* 2014; **15**: 187.
- 434 9. Achermann R, Suter K, Kronenberg A, et al. Antibiotic use in adult outpatients in  
435 Switzerland in relation to regions, seasonality and point of care tests. *Clin Microbiol Infect*  
436 2011; **17**(6): 855-61.
- 437 10. Drekonja DM, Filice GA, Greer N, et al. Antimicrobial stewardship in outpatient  
438 settings: a systematic review. *Infect Control Hosp Epidemiol* 2015; **36**(2): 142-52.
- 439 11. Butler CC, Simpson SA, Dunstan F, et al. Effectiveness of multifaceted educational  
440 programme to reduce antibiotic dispensing in primary care: practice based randomised  
441 controlled trial. *BMJ* 2012; **344**: d8173.
- 442 12. Gjelstad S, Hoyer S, Straand J, Brekke M, Dalen I, Lindbaek M. Improving antibiotic  
443 prescribing in acute respiratory tract infections: cluster randomised trial from Norwegian  
444 general practice (prescription peer academic detailing (Rx-PAD) study). *BMJ* 2013; **347**:  
445 f4403.
- 446 13. O'Connell DL, Henry D, Tomlins R. Randomised controlled trial of effect of feedback  
447 on general practitioners' prescribing in Australia. *BMJ* 1999; **318**(7182): 507-11.
- 448 14. Hallsworth M, Chadborn T, Sallis A, et al. Provision of social norm feedback to high  
449 prescribers of antibiotics in general practice: a pragmatic national randomised controlled  
450 trial. *Lancet* 2016.
- 451 15. Hemkens LG, Saccilotto R, Reyes SL, et al. Personalized prescription feedback to  
452 reduce antibiotic overuse in primary care: rationale and design of a nationwide pragmatic  
453 randomized trial. *BMC Infectious Diseases* 2016; **16**: 421.

454 16. Schmidlin K, Clough-Gorr KM, Spoerri A. Privacy Preserving Probabilistic Record  
455 Linkage (P3RL): a novel method for linking existing health-related data and maintaining  
456 participant confidentiality. *BMC Med Res Methodol* 2015; **15**(1): 46.  
457
