# Supplementary material
Source: PubMed Central journal article supplement (PMC9989898)
Supplement: jamainternmed-e226529-s003.pdf [file jamainternmed-e226529-s003.pdf]

## Data Sharing Statement

Aghlmandi. Effect of Antibiotic Prescription Audit and Feedback on Antibiotic Prescribing in Primary Care. *JAMA Intern Med.* Published February 06, 2023.

doi:10.1001/jamainternmed.2022.6529

### Data

**Data available:** No

### Additional Information

**Explanation for why data not available:** The data has been received from health insurance and I have a strict confidentiality agreement with them not to share the data.
